# Supplementary material for: Management strategies for chronic rhinosinusitis: a qualitative study of GP and ENT specialist views of current practice in the UK
Source: PubMed Central journal article supplement — BMJ Open. 2018 Dec 19;8(12):e022643. doi: 10.1136/bmjopen-2018-022643 (PMC6303610; doi:10.1136/bmjopen-2018-022643), 2018-12-19
Supplement: bmjopen-2018-022643.draft_revisions.pdf [file bmjopen-2018-022643.draft_revisions.pdf]

# BMJ Open

BMJ Open is committed to open peer review. As part of this commitment we make the peer review history of every article we publish publicly available.

When an article is published we post the peer reviewers' comments and the authors' responses online. We also post the versions of the paper that were used during peer review. These are the versions that the peer review comments apply to.

The versions of the paper that follow are the versions that were submitted during the peer review process. They are not the versions of record or the final published versions. They should not be cited or distributed as the published version of this manuscript.

BMJ Open is an open access journal and the full, final, typeset and author-corrected version of record of the manuscript is available on our site with no access controls, subscription charges or pay-per-view fees (<http://bmjopen.bmj.com>).

If you have any questions on BMJ Open's open peer review process please email [editorial.bmjopen@bmj.com](mailto:editorial.bmjopen@bmj.com)

# BMJ Open

## Management strategies for chronic rhinosinusitis: A qualitative study of GP and ENT specialist views of current practice in the UK.

|                               |                                                                                                                                                                                                                                                                                                                                                                                                                                                                                                                                                                                                                                                                                                        |
|-------------------------------|--------------------------------------------------------------------------------------------------------------------------------------------------------------------------------------------------------------------------------------------------------------------------------------------------------------------------------------------------------------------------------------------------------------------------------------------------------------------------------------------------------------------------------------------------------------------------------------------------------------------------------------------------------------------------------------------------------|
| Journal:                      | <i>BMJ Open</i>                                                                                                                                                                                                                                                                                                                                                                                                                                                                                                                                                                                                                                                                                        |
| Manuscript ID                 | bmjopen-2018-022643                                                                                                                                                                                                                                                                                                                                                                                                                                                                                                                                                                                                                                                                                    |
| Article Type:                 | Research                                                                                                                                                                                                                                                                                                                                                                                                                                                                                                                                                                                                                                                                                               |
| Date Submitted by the Author: | 28-Feb-2018                                                                                                                                                                                                                                                                                                                                                                                                                                                                                                                                                                                                                                                                                            |
| Complete List of Authors:     | Vennik, Jane; University of Southampton , Primary Care and Population Sciences<br>Eyles, Caroline; University of Southampton, Primary Care and Population Sciences<br>Thomas, Mike; University of Southampton, Primary Care and Population Sciences<br>Hopkins, claire; Guys Hospital, ENT<br>Little, Paul; University of Southampton, Primary Care and Population Science<br>Blackshaw, Helen; UCL Ear Institute, evidENT<br>Schilder, Anne; University College London Ear Institute<br>Boardman, Jim; Fifth Sense: the charity of people with smell and taste disorders<br>Philpott, Carl; University of East Anglia,, Norwich Medical School; James Paget University Hospitals NHS Foundation Trust |
| Keywords:                     | QUALITATIVE RESEARCH, Sinusitis, Sinus surgery, ENT views, GP views                                                                                                                                                                                                                                                                                                                                                                                                                                                                                                                                                                                                                                    |
|                               |                                                                                                                                                                                                                                                                                                                                                                                                                                                                                                                                                                                                                                                                                                        |

SCHOLARONE™  
Manuscripts

## Title

Management strategies for chronic rhinosinusitis: A qualitative study of GP and ENT specialist views of current practice in the UK.

---

## Authorship

Jane Vennik<sup>1</sup>, Caroline Eyles<sup>1</sup>, Mike Thomas<sup>1</sup>, Claire Hopkins<sup>2</sup>, Paul Little<sup>1</sup>, Helen Blackshaw<sup>3</sup>, Anne Schilder<sup>3</sup>, Jim Boardman<sup>4</sup>, Carl Philpott<sup>5,6</sup>.

<sup>1</sup> Primary Care and Populations Sciences, Faculty of Medicine, University of Southampton, Aldermoor Close, Southampton. SO16 5ST

<sup>2</sup> Guy's and St. Thomas' NHS Foundation Trust

<sup>3</sup> evidENT, University College London

<sup>4</sup> Fifth Sense: a charity for people with smell and taste disorders

<sup>5</sup> Norwich Medical School, University of East Anglia, Norwich. NR4 7TJ

<sup>6</sup> James Paget University Hospital NHS Foundation Trust, Gorleston, NR31 6LA

## Corresponding Author

Dr J Vennik

[j.vennik@soton.ac.uk](mailto:j.vennik@soton.ac.uk)

Word count: 3378 without quotes, (4585 with quotes)

## Abstract

### Objectives:

To explore GP and ENT specialist perspectives of current treatment strategies for chronic rhinosinusitis (CRS) and care pathways through primary and secondary care.

### Design:

Semi-structured qualitative telephone interviews as part of the MACRO programme.

### Setting

Primary care and secondary care ENT outpatient clinics in the UK

### Participants

Twelve GPs and 9 ENT specialists consented to in-depth telephone interviews. Transcribed recordings were managed using NVivo software and analysed using inductive thematic analysis

### Main outcome measures

Healthcare professional views of management options and care pathways for CRS.

### Results

GPs describe themselves as confident in recognising CRS, with the exception of assessing nasal polyps. In contrast, specialists report common missed diagnoses (e.g. allergy; chronic headache) when patients are referred to ENT clinics, and attribute this to the limited ENT training of GPs. Steroid nasal sprays provide the foundation of treatment in primary care, although local prescribing restrictions can affect treatment choice and poor adherence is perceived to be the causes of inadequate symptom control. Symptom severity, poor response to medical treatment, and patient pressure drive referral, although there is uncertainty about optimal timing. Treatment decisions in secondary care are based on disease severity, polyp status, prior medical treatment and patient choice, but there is major uncertainty about the place of longer courses of antibiotics and the use of oral steroids. Surgery is regarded as an important treatment option for patients with severe symptoms or with nasal polyps, although timing of surgery remains unclear, and the uncertainty about net longer term benefits of surgery makes balancing of benefits and risks more difficult.

### Conclusions

Clinicians are uncertain about best management of patients with CRS in both primary and secondary care and practice is varied. An integrated care pathway for CRS is needed to improve patient management and timely referral.

## Strengths and limitations

- The interviews permitted exploration of diagnosis, treatment and management strategies for patients with CRS through primary and secondary care.
- The inclusion of generalist and specialist views helped to provide a better understanding of CRS management from multiple perspectives. However, it is possible that our sample of clinicians were particularly interested in CRS or research of this nature and thus their views may not represent those of the non-respondents.
- Participants were sampled from different geographical areas of England and Scotland, enhancing transferability of the study findings.
- Patient views and experiences are not included but are presented elsewhere.

## Introduction

Chronic rhinosinusitis (CRS) is a prevalent chronic inflammatory condition of the nose and paranasal sinuses which significantly affects the health and quality of life of patients<sup>1, 2</sup>, and contributes a significant burden to NHS healthcare resources. CRS is defined in the European Position Paper on Rhinosinusitis (EPOS 2012)<sup>3</sup> by the presence of at least two symptoms, one of which must be either nasal congestion or nasal discharge together with facial pain/pressure and/or anosmia lasting for more than 12 weeks. This is then further qualified by the presence (CRSwNP) or absence of nasal polyps (CRSSNP). Based on the symptom and duration definition alone, prevalence rates are estimated at 10% in the UK<sup>4</sup>. Longitudinal data from the Clinical Practice Research Datalink (CPRD) suggests that 1% of British adults receive treatment each year in primary care, resulting in multiple GP consultations and medical prescriptions<sup>5</sup>. There is significant onward referral to specialist ENT services leading to 120,000 outpatient appointments and 40,000 sinus operations annually in England and Wales<sup>6</sup>.

To date there are no NICE guidelines for managing patients with CRS, and whilst European (EPOS) guidelines<sup>3</sup> and commissioning guidelines<sup>7</sup> are present, awareness and uptake in UK practice is unclear. Intranasal corticosteroids (INCS) and nasal irrigation are strongly recommended based on high-quality evidence<sup>8-10</sup>, however there are uncertainties about uptake and compliance in primary care. Most GP consultations for acute or chronic rhinosinusitis result in an antibiotic prescription despite insufficient evidence for routine use<sup>11</sup>. Uncertainties in secondary care result in a 5-fold variation in surgical rates around the UK<sup>6</sup> and there is conflicting evidence for the use of long-term antibiotics<sup>12</sup>.

The views and experiences of healthcare professionals involved in the CRS patient pathway have yet to be investigated in depth. As yet, no studies have explored GP practice variation in terms of knowledge of the guidelines, treatment decisions and referral criteria, and there

1  
2  
3 is limited understanding of ENT specialist views and experiences of treating patients with  
4 CRS.  
5

6 MACRO (Defining best Management for Adults with Chronic Rhinosinusitis)<sup>13</sup> is an NIHR  
7 funded programme of research designed to establish best practice for CRS management in  
8 adults across primary and secondary care. This paper reports a qualitative interview study,  
9 conducted as part of the MACRO programme, exploring GP and ENT specialist views of  
10 current treatment strategies and care pathways for CRS patients through primary and  
11 secondary care.  
12  
13  
14

## 15 **Methods**

### 16 **Design**

17  
18 A qualitative interview study was conducted with a purposeful sample of GPs and ENT  
19 specialists between January and April 2017.  
20  
21  
22  
23

### 24 **Participants and procedures**

25  
26 GPs were approached through the NIHR Clinical Research Network (CRN) in regions of  
27 Wessex, Eastern and South East England. Fifteen interested GPs responded to the study  
28 team and were purposefully sampled for a range of characteristics including gender, GP  
29 experience, practice location and practice population demographics.  
30  
31  
32  
33

34 ENT specialists were recruited through an email to the membership of ENT-UK (the  
35 professional body representing ENT surgeons). Thirty-one ENT specialists from England and  
36 Scotland expressed an interest in participating and were purposefully sampled for a range of  
37 demographics and ENT sub-speciality interest.  
38  
39  
40

### 41 **Interviews**

42  
43 A trained interviewer (JV) conducted semi-structured telephone interviews with participants  
44 each lasting approximately 25-55 minutes. JV (female) is a research fellow for the MACRO  
45 programme, trained in qualitative research methods, who was not previously known to the  
46 interview participants. Telephone interviews were employed to allow inclusion of  
47 participants from a wide geographical area. Each participant gave verbal consent prior to  
48 commencing the interview. An interview guide (Appendix 1) was developed through  
49 collaboration and input from the wider MACRO research team, and subsequently piloted  
50 with an ENT specialist and minor modifications made to reflect any issues that arose. The  
51 guide was used to direct but not constrain the interviews and was sufficiently flexible to  
52  
53  
54  
55  
56  
57  
58  
59  
60

1  
2  
3 allow exploration of unexpected topics and themes. Field notes were used to facilitate  
4 interpretation and contextualisation of the interviews.  
5

6 GPs and ENT specialists were asked open-ended questions about their views of the  
7 diagnosis and management of CRS, knowledge and implementation of CRS guidelines,  
8 perceptions of the evidence base and experiences of practical decision-making in the  
9 management of patients with CRS. The interviews were audio-recorded and transcribed  
10 verbatim in preparation for analysis. Our epistemological position is one of subtle realism,  
11 and a pragmatic approach was adopted in this study.  
12  
13  
14

## 15 **Analysis**

16 Inductive thematic analysis<sup>14</sup> was used to analyse the interview transcripts, using NVIVO 11  
17 to facilitate data management. Analysis commenced with familiarisation and immersion in  
18 the data itself, leading to identification of initial patterns and themes within the data set.  
19 Descriptive codes were then used to label sections of the data. A number of transcripts  
20 were coded by more than one researcher (JV and CE) which brings multiple perspectives to  
21 the analysis and provides an opportunity to discuss coding decisions at an early stage.  
22 Codes were then developed and refined as analysis progressed, and where uncertainties  
23 arose, team discussions facilitated agreement and adjustment. These codes were then  
24 linked together, grouped, refined and re-labelled resulting in a set of themes and sub-  
25 themes which systematically and thoroughly explained the data. Data collection and  
26 analysis took place concurrently, and interviews continued until data saturation was  
27 achieved.  
28  
29  
30  
31  
32  
33  
34  
35

## 36 **Patient involvement**

37 A patient contributor (JB) from the MACRO programme management group provided input  
38 into the design of the study from the patient perspective, and contributed to the  
39 development of the interview topic guide.  
40  
41  
42  
43  
44  
45  
46  
47  
48  
49  
50  
51  
52  
53  
54  
55  
56

## Results

### Participants

A total of 12 GPs participated in the study. 8 (76%) were male with median duration in general practice of 20 years (range 2-29). Included GPs were from rural and urban practices, from areas of differing social deprivation. Nine ENT specialists including general ENT surgeons and rhinologists also took part in a research interview; 8 were male with a median time on the specialist register of 19 years (range 8-21). Full details are presented in table 1.

Table 1: Participant characteristics

| <b>GP Characteristics</b>                                                                      | <b>N=12</b>         |
|------------------------------------------------------------------------------------------------|---------------------|
| Years in general practice (median, range)                                                      | 20 (2-29)           |
| Male                                                                                           | 8                   |
| Practice list size mean (range)                                                                | 9967 (4758 - 18571) |
| Practice deprivation decile<br>(where 1 is most deprived, 10 is least deprived) median (range) | 9 (3-10)            |
| Practice location                                                                              |                     |
| – Rural town and fringe                                                                        | 4                   |
| – Rural village and dispersed                                                                  | 1                   |
| – Urban city and town                                                                          | 4                   |
| – Urban major conurbation                                                                      | 3                   |
| <b>ENT specialist characteristics</b>                                                          | <b>N=9</b>          |
| Time (years) on specialist register (Otolaryngology) (median, range)                           | 19 (8-21)           |
| Male                                                                                           | 8                   |
| Sub-specialisation                                                                             |                     |
| – General ENT surgeon                                                                          | 3                   |
| – Special interest in rhinology                                                                | 4                   |
| – Consultant rhinologist                                                                       | 2                   |
| Location                                                                                       |                     |
| – Yorkshire and Humberside                                                                     | 1                   |
| – Midlands                                                                                     | 1                   |
| – London                                                                                       | 1                   |
| – South East                                                                                   | 4                   |
| – Scotland                                                                                     | 2                   |



## **Themes**

Thematic analysis identified 4 main themes relating to the management of patients with CRS (Table 2). Quotations are presented to illustrate the themes and sub-themes, with details of the participants presented in parentheses.

**Table 2: Themes and sub-themes**

| <b>Theme</b>                   | <b>Sub-theme</b>                                                                                                                                                     |
|--------------------------------|----------------------------------------------------------------------------------------------------------------------------------------------------------------------|
| 1. Diagnostic uncertainties    | <ul style="list-style-type: none"> <li>• Reaching a diagnosis</li> <li>• Distinguishing between sub-groups</li> </ul>                                                |
| 2. Selecting best management   | <ul style="list-style-type: none"> <li>• Treatment decisions</li> <li>• Initiation treatment in primary care</li> <li>• Further medical treatment options</li> </ul> |
| 3. Decision-making for surgery | <ul style="list-style-type: none"> <li>• Implementing guidelines</li> <li>• Value of sinus surgery</li> <li>• Joint decision-making</li> </ul>                       |
| 4. Transition of care          | <ul style="list-style-type: none"> <li>• Factors affecting referral</li> <li>• Quality of referral</li> </ul>                                                        |

### **Theme 1: Diagnostic uncertainties**

#### **Reaching a diagnosis**

GPs describe themselves as confident in recognising CRS, making a diagnosis based on patient-reported history of symptoms and impact on quality of life, together with a basic physical examination of the nose. Duration of symptoms was described as an important diagnostic factor, although there is some uncertainty in primary care about the definition of chronicity.

---

*Then I guess really the diagnosis comes down to the time course more than anything. Assuming that that cluster of symptoms is present, it comes down to the time course. (GP 04)*

---

On the contrary, ENT specialists describe primary care diagnosis of CRS as of variable quality and precision, with many patients presenting at ENT clinics with a misdiagnosis.

---

*So I think, therefore, their diagnostic ability for ENT conditions, broadly, and rhinosinusitis in particular, can be very poor (ENT 01)*

---

1  
2  
3 Uncertainties can arise when symptoms overlap with other conditions, such as chronic  
4 headaches and allergic rhinitis, which can lead to patients receiving ineffective treatments.  
5

---

6  
7  
8 *We see lots of patients who are referred with "recurrent sinus infections"*  
9 *where their main presenting symptom may be facial pain or headache, and*  
10 *most of those patients, in my experience, with those symptoms, don't have*  
11 *rhinosinusitis. (ENT 02)*  
12

---

13  
14 ENT specialists also describe a diagnostic challenge where there is a dissociation between  
15 patient symptom history and clinical findings.  
16

---

17  
18 *There's a well-defined group of patients who have symptoms which are on*  
19 *history virtually indistinguishable from CRS who actually have nothing on*  
20 *nasal endoscopy, in other words completely normal nasal endoscopy, and*  
21 *when the CT scan comes back that's completely normal as well (ENT 05)*  
22  
23

---

### 24 25 26 **Distinguishing between sub-groups** 27

28  
29 GPs report some difficulties in diagnosing patients with nasal polyps unless polyps are visible  
30 in the nasal cavity, due to the lack of diagnostic equipment in primary care.  
31

---

32  
33 *Yes, with polyps, on the outset, if we have a patient with these symptoms,*  
34 *to sort of diagnose polyps is very difficult for us unless they've got a*  
35 *previous diagnosis (GP 08)*  
36  
37

---

38  
39 In contrast, ENT specialists report the diagnosis of CRS without nasal polyps to be more  
40 challenging particularly when there is an absence of clinical findings on examination.  
41

---

42  
43 *The diagnosis of chronic rhinosinusitis without nasal polyps is really, really*  
44 *difficult. As I say, some of them will actually have pus dripping from their*  
45 *sinus into the nose, and that's very easy, but the majority of them don't*  
46 *have that at all. (ENT 08)*  
47  
48

---

## Theme 2: Selecting best management

### Treatment decisions

GPs report using local guidelines, journal articles, online learning modules and GP educational sessions to keep up to date with current practices. However, GP update courses are described as often too general and cover a broad range of topics. Events provided by the local ENT department were described as extremely useful but were infrequent.

---

*I tend to do a lot of online stuff, so I'll look at BMJ or RCGP learning. Sometimes, we get local events. We've not had a local ENT event recently, but we do get local consultants or specialist nurses, sometimes, come out and give us updates and guidelines. (GP 05)*

---

GPs also describe ENT clinic letters as useful and informative about current practice for managing patients with CRS.

---

*You get a flavour of reading letters and so you get an idea of what they recommend in their letters. (GP 09)*

---

Nonetheless, ENT specialists expressed opinion that GPs have limited ENT training and some are poorly trained to recognise and understand symptoms and pathology of CRS.

---

*Most GPs have never done any ENT jobs, ever, in their training. Most medical students don't get any ENT teaching, or very minimal ENT teaching, so you then have a sub-set of GPs who don't know any ENT unless it's what they've been told by their GP colleagues on the odd course they go to. (ENT 01)*

---

### Initiating treatment in primary care

Intranasal corticosteroids (INCS) were commonly described as first line treatment for patients with CRS, with the choice often associated with GP preference and experience. However, some GPs describe local prescribing restrictions where they are encouraged to either prescribe from the local formulary or to switch to cheaper nasal sprays in order to reduce costs.

---

*There will pop up a box [on our computers] saying, 'This costs this much, why don't you use this one which costs only this much?' So we're constantly reminded to use cost effective things. (GP 02)*

---

However, both GPs and ENT specialists suggested that patients did not always apply their nasal sprays correctly or did not comply with the treatment regimen over a longer period of time.

---

*It's quite obvious that they have been sniffing too much and it's gone all the way to the back of the throat, and they're using it incorrectly, maybe because no one informed them of how to use it in the past. (GP 06)*

---

GPs describe prescribing short courses of antibiotics for patients with acute infection, purulent discharge, febrile patients, and for those who are most severely affected. However, some GP report feeling pressured by patients to prescribe antibiotics especially if symptoms are particularly severe or the patient has responded to antibiotics in a previous episode.

---

*The biggest challenge is patients wanting antibiotics because they think that will cure everything! (GP 05)*

---

Most GPs reported limited use of saline irrigation in primary care. Despite recommendations from ENT, GPs were unfamiliar with the evidence and therefore unlikely to recommend them to patients, or patients were concerned about the cost of proprietary preparations.

---

*ENT doctors recommend it [saline irrigation] to patients, but that's not something I'd recommend myself.....I just wasn't aware if it was evidence-based, or if it was something we should be recommending (GP 09).*

---

### **Further medical treatment options**

Some ENT specialists report the use of long term antibiotics for patients with CRS, although there is uncertainty about which patients might benefit and the optimum length of treatment.

---

*I think the issue is about what is the role of long-term antibiotics in rhinosinusitis and particularly the clarithromycin group of antibiotics? It is something I am aware of being used increasingly and I do now use in some patients (ENT 02).*

---

There is a mixed opinion about whether long-term antibiotics are appropriate for CRS patients with nasal polyps, with some ENT specialists describing them as ineffective, and a lack of evidence for their routine use. Others, however, recount prescribing low dose antibiotics alongside oral steroids for nasal polyps prior to consideration for surgery.

---

*I don't use clarithromycin for polyps. I know some people do but I don't because from my reading of the literature and all that I don't really see any of the benefit; (ENT07).*

---

Most GPs reported being unfamiliar with long term antibiotic use for CRS in primary care, and some were concerned about the potential for side effects.

---

*I don't have any experience of it. I'm not keen on long term courses of antibiotics, for this particular condition. (GP 07)*

---

GPs described infrequent use of oral steroids in primary care. ENT specialists report the use of oral steroids in the pre-operative pathway for patients with polyp disease. A rescue course of oral steroids is sometimes used for severe patients when symptoms are uncontrolled. Oral steroids were reported as rarely recommended for patients without nasal polyps.

---

*I think most people would say that the polyp group need a lot more oral steroid and a lot less antibiotic, and the non-polyp group need a lot less steroid and a lot more antibiotic, in general terms. (ENT08)*

---

### **Theme 3: Decision-making for surgery**

#### **Implementing guidelines**

ENT specialists keep up to date with current practices in CRS by reading rhinology journals and attending ENT conferences. All ENT specialists were familiar with the EPOS guidelines and described them as a good source of evidence for diagnosis and treatment decisions, although most general ENT surgeons did not refer to them on a daily basis.

---

*So generally EPOS guidelines are probably the thing that I pay the most attention to. (ENT09)*

---

### **Value of sinus surgery**

ENT specialists describe sinus surgery as an important treatment for patients with severe disease, and when medical treatment options have been explored.

---

*Well, I think the patients at the more severe end of the spectrum, I think it offers them the best chance of a long-term improvement in symptoms. (ENT 05)*

---

Similarly, GPs viewed sinus surgery as a treatment option which should be reserved for more severe patients who have tried all available medical treatments.

---

*I think there is a role for surgery but I'm not someone who likes intervention. So, I would, initially, try all the things, the nasal therapies, basically, to see if that does the job first. Surgery is a last resort, for me. (GP 07)*

---

However, some specialists describe uncertainties about the value of a surgical intervention for an inflammatory condition.

---

*I'm not intellectually massively impressed by it, if I'm absolutely honest with you, the idea of doing an operation to help a mucosal inflammatory problem (ENT 08)*

---

ENT specialists identify the role of surgery in polyp disease and report prioritising these patients for surgical intervention.

---

*The severe polyp patients, the ones who are completely bunged up, I wouldn't bother with any of the medical therapy. I just put them on my operating list for surgery (ENT 05)*

---

Both GPs and specialists view surgery as a temporary rather than permanent solution for CRS. ENT specialists recount that most patients require ongoing medical treatment to manage symptoms after surgery, and GPs describe surgery as rarely a long-term solution for patients with CRS.

---

*I mean I think it's rare that surgery is curative for those people, I would say, they don't just go and have one operation and never have any problems with their nose and sinuses for the rest of their life! These patients come back and back, even when they've had surgery. (GP 02)*

---

### **Joint decision-making**

ENT specialists reported that decision-making for surgery is made jointly with the patient after all treatment options, risks and potential benefits have been discussed.

---

*It's very much up to the patients. Our patients are a very switched on bunch of people. They totally like to be involved in their decision, (ENT 09)*

---

However, both GPs and ENT specialists recognise that some patients have a high expectation for surgery whilst others express a reluctance for surgery, especially repeat surgery.

---

*Then there are some people who definitely want surgery from the outset, and don't want to have medical therapy, and they're difficult to manage because they won't accept a trial of medical therapy, because they've had antibiotics before and they've had those sprays and those drops, and they don't work, (ENT 01)*

---

Some GPs describe advising patients against surgery due to the possible complications, side effects and potentially limited benefits.

---

*I tend to counsel people fairly strongly against having sinus surgery because I just don't believe it's a long-term benefit in the vast majority of cases (GP 04)*

---

Both GPs and ENT specialists recognise the potential risks of sinus surgery and describe the importance of balancing these against uncertain symptomatic relief for patients.

---

*ENT surgery is painful, causes people to have a lot of time off work and may not yield high benefit and may make the problem worse. So I would have thought that that should come at a later stage, so not to cause harm (GP 01).*

---

## Theme 4: Transition of care

### Factors affecting referral

GPs use their clinical judgement when deciding either to continue to manage a patient in primary care or to refer for specialist opinion and further treatment options. The impact of symptoms on a patient's quality of life and response to medical treatments were recognised by GPs as important factors for referral.

---

*It really hinges, I think, on whether they're getting better with the simple treatment that we've put in place. If they're not getting better and it's affecting them and having effect on their functioning and their quality of life, then I would refer them. (GP 11)*

---

GPs explained that patients with visible nasal polyps and those with structural abnormalities were prioritised for referral due to the potential need for surgical intervention.

---

*I would refer someone if they had obstructing polyps that hadn't responded to medical polypectomy, assuming that they wanted to have a surgical polypectomy, (GP 04)*

---

Some GPs report patient pressure for early referral, although many GPs report giving patients the choice about continued treatment in primary care or referral for a specialist opinion.

---

*In some instances where they're adamant that they want to see a specialist, then we've had to write directly to the clinic and bypassing the referral to say that specifically this patient is wanting to see a specialist. (GP 08)*

---

Many GPs were unaware of local referral guidelines for CRS and based their decision for referral on personal experience. However, others described a referral triage system or a local referral support service who screen the referral against local guidelines.

---

*So, for the referral form, the guidelines are actually attached to that. So, at the point of referral, you can actually have a look at that and see if this patient fits or if there is more for you to do before it gets to ENT. (GP 07)*

---



## **Quality of referral**

ENT specialists report wide variation in the timing and quality of GP referrals to secondary care. Some specialists observed a delay in referral when symptoms are severe and suggest that earlier referral would be easier to treat and result in better outcomes for patients.

---

*So I quite frequently see patients that have suffered symptoms for many months, if not years. It's a very frequent comment that I get from patients, saying I've been trying to get referred to a specialist for ages and ages and they just won't refer me and they just give me nose drops and sprays. (ENT 05)*

---

Equally, other specialists report cases of premature referral, when patients have not received maximal available medical treatment in primary care.

---

*I think I might criticise them for referring too presumptuously because I think we do get referrals from GPs who haven't actually even initiated medical therapy. (ENT 02)*

---

## **Discussion**

### **Synopses of key findings**

This study explored GPs and ENT specialist views of current practice for managing patients with CRS. GPs describe themselves as confident in recognising CRS with the exception of nasal polyps, however, surgeons report common missed diagnoses when patients are referred to ENT clinics and attribute this to the limited ENT training of GPs and lack of available diagnostic tests or equipment. Local prescribing restrictions can affect choice of INCS in primary care and poor adherence is perceived to be the causes of inadequate symptom control. Symptom severity, poor response to medical treatment and patient pressure drives referral, although there is lack of clarity about optimal timing. ENT clinic letters are a valuable information source for GPs and ENT training courses are useful but infrequent. Treatment decisions in secondary care are based on disease severity, polyp status, prior medical treatment and patient choice. Long-term antibiotic use is variable and specialists are uncertain about optimal dosing and which patients might benefit. Surgery is regarded as an important treatment option for patients with severe symptoms and especially in those with nasal polyps, although timing of surgery remains unclear, and the

1  
2  
3 uncertainty about net longer term benefits of surgery makes balancing of benefits and risks  
4 more difficult.  
5

## 6 **Comparison with current literature**

### 7 **GP Management:**

8  
9  
10  
11 The findings of this study suggests that there is wide variation in the diagnosis and  
12 management of CRS in primary care in the UK, which is likely to be due to limited ENT  
13 training and insufficient national guidance. It has been long recognised that GPs receive  
14 limited ENT training at both undergraduate and postgraduate level<sup>15</sup> and this is particularly  
15 important in light of the number of ENT conditions that are initially seen in general practice.  
16 Our findings agree with previous research that GPs would like further ENT training<sup>16</sup>, and  
17 that regional courses and updates might be useful to improve knowledge, clinical skills and  
18 referral pathways to secondary care.  
19  
20  
21  
22

23 Intranasal corticosteroids (INCS) are commonly prescribed for CRS, however our research  
24 identified local prescribing restrictions and that both adherence and adequacy of correct  
25 nasal spray use by patients was perceived to be extremely variable. These findings support  
26 the results of a case-control study in the UK which found that current INCS usage is less than  
27 15% in CRS patients, and only 1% of patients regularly use saline nasal irrigation<sup>17</sup>. Such  
28 usage may result in poor symptom control and untimely referral. Reasons for low usage are  
29 likely to be multifactorial. Previous qualitative work has identified that patients can be  
30 dissatisfied with topical treatments due to their perceived ineffectiveness<sup>18</sup> and concern  
31 about potential side effects<sup>19</sup>. Similarly, nasal irrigation was not widely advocated by GPs in  
32 this study due to uncertainties about effectiveness and a perceived burden for patients.  
33 However, there is now evidence from a recent trial which found nasal irrigation to be  
34 acceptable to patients with recurrent or chronic rhinosinusitis and provides symptomatic  
35 benefit in the primary care setting<sup>20, 21</sup>. Currently in the UK, nasal irrigation kits cannot be  
36 prescribed by GPs as they are considered medical devices rather than medicines, so have to  
37 be purchased by patients and costs may deter uptake.  
38  
39  
40  
41  
42  
43

44 Some GPs described uncertainty about the optimal timing of referral, with wide variation in  
45 practice and a lack of clarity about referral criteria for both CRSsNP and CRSwNP.  
46 Correspondingly, ENT specialists reported variation in timing and precision of referral,  
47 expressing concerns that some patients experience unnecessarily delays, whilst others were  
48 referred too early and without trials of basic medical treatment. The EPOS guidelines<sup>3</sup>  
49 recommend referral in patients where no improvement has been achieved after 4 weeks of  
50 treatment with INCS and nasal irrigation. However, knowledge and uptake of the European  
51 guideline is understandably variable in UK primary care. An audit of CCGs in England found  
52 that compliance with CRS commissioning was limited in 13% of CCGs<sup>22</sup>. It may be that such  
53  
54  
55  
56  
57  
58  
59  
60

1  
2  
3 guidance is not perceived in the same way that NICE guidance is viewed, affecting  
4 management and referral decisions, and fostering the variation of practice reported in this  
5 study.  
6  
7  
8  
9

### 10 **ENT management**

13 Our study highlighted wide variation in diagnostic criteria and management decisions for  
14 CRS even amongst ENT specialists. Practice variation in usage of long-term antibiotics and  
15 timing of sinus surgery suggest that there is a lack of clarity around the evidence base for  
16 treatment of both CRSsNP and CRSwNP. There remains a paucity of evidence for sinus  
17 surgery, and more research is required to understand best timing, although emerging  
18 evidence shows that surgery undertaken closer to the time of diagnosis may improve  
19 longer-term outcomes both in terms of symptoms and late onset asthma<sup>23, 24</sup>. There is also a  
20 perception amongst GPs and ENT specialists in this study that surgery was not of any long-  
21 term benefit and that patients will simply keep returning; this is of course borne out by the  
22 high revision rate seen in two UK national studies<sup>25, 26</sup>. A key part of this issue is the post-  
23 operative care and compliance with topical treatment. The forthcoming trial in the MACRO  
24 programme<sup>13</sup> will address the role of sinus surgery in an RCT context which has not been  
25 done to date, despite many case series showing favourable outcomes, including the UK  
26 Sinonasal audit<sup>27</sup>. There will also be a longer-term plan to follow up the patients beyond the  
27 trial so that the benefits of sinus surgery beyond the short-term can be addressed.  
28  
29  
30  
31  
32  
33  
34  
35

### 36 **Implications for practice**

39 In view of the currently fragmented and diverse situation, there is a need to clarify care  
40 pathways for CRSwNP and CRSsNP across primary and secondary care. Development of an  
41 evidence-based integrated care pathway, informed by patient, generalist and specialist  
42 perspectives, may help to improve management of patients with CRS. Communication  
43 between ENT and general practice needs enhancing, and clarification of treatment and  
44 referral algorithms has the potential to improve early management and precision of  
45 referral. Improving the information to both patients and clinicians as to the appropriate use  
46 of both medical and surgical interventions to best effect, including addressing rationale for  
47 treatment options, safety, technique, compliance and dispelling misperceptions around the  
48 various treatment options, has the potential to improve outcomes and reduce variation and  
49 costs.  
50  
51  
52  
53  
54  
55  
56  
57  
58  
59  
60

## **Strengths and limitations**

A key strength of this study was the inclusion of both generalist and specialist views from representative samples of front-line clinicians, to provide a better understanding of the CRS patient pathway from multiple perspectives which have not been captured in previous studies. However, it is possible that our sample of clinicians were particularly interested in CRS or research of this nature and thus their views may not have represented those of the non-respondents.

A good level of thematic data saturation was achieved with our sample of participants, but we acknowledge that the views of other stakeholders such as nurse practitioners in primary care and staff grade ENT specialists may have provided an additional viewpoint.

Additionally the views and experiences of patients with CRS are important in understanding the patient journey and these are presented elsewhere.

This study used rigorous methods to ensure credibility and trustworthiness of the findings, including multiple coders, constant comparison techniques, and maintained a transparent audit trail.

## **Conclusion**

In summary this qualitative study found that clinicians are uncertain about best management of patients with CRS in both primary and secondary care, and there is wide variation in practice. Improved communication between ENT and general practice together with an evidence-based integrated care pathway for CRSsNP and CRSwNP is needed to improve CRS patient management and timely referral.

## **Author statement**

The protocol was developed by CE, MT, CP, CH, AS, PL and HB. JV led the data collection and analysis, with academic contributions from CE, MT, CP and CH. JV drafted the manuscript and coordinated the revisions from all authors. All authors read and approved the final manuscripts.

A patient contributor (JB) from the MACRO programme management group also provided input into the design of the study, and reviewed and commented on drafts of this manuscript.

## Funding

This study was funded as part of the MACRO Programme Grant for Applied Research (NIHR PGfAR) RP-PG-0614-20011

## Ethical approval

This study was given ethical approval on 22 September 2017 by the Office for Research Ethics Committees Northern Ireland (ORECNI). REC reference: 16/NI/0197

## Competing interests

None declared

## Acknowledgements

The authors would like to thank the healthcare professionals who contributed and made this study possible.

## Data sharing statement

There is no additional data available for sharing.

## References

1. Gliklich RE and Metson R. The health impact of chronic sinusitis in patients seeking otolaryngologic care. *Otolaryngology--head and neck surgery : official journal of American Academy of Otolaryngology-Head and Neck Surgery* 1995; 113: 104-109. 1995/07/01. DOI: 10.1016/s0194-59989570152-4.
2. Wensing M, Vingerhoets E and Grol R. Functional status, health problems, age and comorbidity in primary care patients. *Quality of life research : an international journal of quality of life aspects of treatment, care and rehabilitation* 2001; 10: 141-148. 2001/10/20.
3. Fokkens WJ, Lund VJ, Mullol J, et al. EPOS 2012: European position paper on rhinosinusitis and nasal polyps 2012. A summary for otorhinolaryngologists. *Rhinology* 2012; 50: 1-12. 2012/04/04. DOI: 10.4193/Rhino50E2.

- 1  
2  
3 4. Hastan D, Fokkens WJ, Bachert C, et al. Chronic rhinosinusitis in Europe--an  
4 underestimated disease. A GA(2)LEN study. *Allergy* 2011; 66: 1216-1223. DOI:  
5 10.1111/j.1398-9995.2011.02646.x.  
6
- 7 5. Hopkins C, Holy C and Philpott C. Care pathway of patients with chronic  
8 rhinosinusitis in the UK. 2015. In British Academic Conference in Otorhinolaryngology,  
9 Liverpool.  
10
- 11 6. Hospital Episode statistics, Department of Health. 2013.  
12
- 13 7. Royal College of Surgeons 2013. Commissioning Guide: available at:  
14 [https://www.rcseng.ac.uk/standards-and-research/commissioning/commissioning-](https://www.rcseng.ac.uk/standards-and-research/commissioning/commissioning-guides/topics/)  
15 [guides/topics/](https://www.rcseng.ac.uk/standards-and-research/commissioning/commissioning-guides/topics/).  
16
- 17 8. Chong LY, Head K, Hopkins C, et al. Different types of intranasal steroids for chronic  
18 rhinosinusitis. *Cochrane Database Syst Rev* 2016; 4: Cd011993. 2016/04/27. DOI:  
19 10.1002/14651858.CD011993.pub2.  
20
- 21 9. Chong LY, Head K, Hopkins C, et al. Intranasal steroids versus placebo or no  
22 intervention for chronic rhinosinusitis. *Cochrane Database Syst Rev* 2016; 4: Cd011996.  
23 2016/04/27. DOI: 10.1002/14651858.CD011996.pub2.  
24
- 25 10. Chong LY, Head K, Hopkins C, et al. Saline irrigation for chronic rhinosinusitis.  
26 *Cochrane Database Syst Rev* 2016; 4: Cd011995. 2016/04/27. DOI:  
27 10.1002/14651858.CD011995.pub2.  
28
- 29 11. Gulliford MC, Dregan A, Moore MV, et al. Continued high rates of antibiotic  
30 prescribing to adults with respiratory tract infection: survey of 568 UK general practices.  
31 *BMJ Open* 2014; 4: e006245. 2014/10/29. DOI: 10.1136/bmjopen-2014-006245.  
32
- 33 12. Lasso A, Masoudian P, Quinn JG, et al. Long-term low-dose macrolides for chronic  
34 rhinosinusitis in adults - a systematic review of the literature. *Clinical otolaryngology :*  
35 *official journal of ENT-UK ; official journal of Netherlands Society for Oto-Rhino-Laryngology*  
36 *& Cervico-Facial Surgery* 2017; 42: 637-650. 2016/11/04. DOI: 10.1111/coa.12787.  
37
- 38 13. The MACRO programme, <https://www.themacroprogramme.org.uk/> (accessed  
39 January 2018).  
40
- 41 14. Braun V and Clarke V. Using thematic analysis in psychology. *Qualitative Research in*  
42 *Psychology*, 3, 77-101. 2006.  
43
- 44 15. Clamp PJ, Gunasekaran S, Pothier DD, et al. ENT in general practice: training,  
45 experience and referral rates. *The Journal of Laryngology & Otolology* 2006; 121: 580-  
46 583. 10/19. DOI: 10.1017/S0022215106003495.  
47
- 48 16. Easto RH and Reddy V. A survey of ENT experience in South West Peninsula general  
49 practitioner trainees: how can post-graduate ENT training be improved? *The Journal of*  
50 *Laryngology & Otolology* 2016; 130: 893-896. 09/08. DOI:  
51 10.1017/S0022215116008665.  
52

- 1  
2  
3 17. Philpott C, Erskine S, Smith R, et al. Current Use of Baseline Medical Treatment in  
4 Chronic Rhinosinusitis: Data from the National Chronic Rhinosinusitis Epidemiology Study  
5 (CRES). *Clinical otolaryngology : official journal of ENT-UK ; official journal of Netherlands*  
6 *Society for Oto-Rhino-Laryngology & Cervico-Facial Surgery* 2017 2017/10/22. DOI:  
7 10.1111/coa.13012.  
8
- 9 18. Erskine SE, Verkerk MM, Notley C, et al. Chronic rhinosinusitis: patient experiences  
10 of primary and secondary care - a qualitative study. *Clinical otolaryngology : official journal*  
11 *of ENT-UK ; official journal of Netherlands Society for Oto-Rhino-Laryngology & Cervico-*  
12 *Facial Surgery* 2016; 41: 8-14. 2015/05/15. DOI: 10.1111/coa.12462.  
13  
14
- 15 19. Hellings PW, Dobbels F, Denhaerynck K, et al. Explorative study on patient's  
16 perceived knowledge level, expectations, preferences and fear of side effects for treatment  
17 for allergic rhinitis. *Clinical and translational allergy* 2012; 2: 9. 2012/05/31. DOI:  
18 10.1186/2045-7022-2-9.  
19
- 20 20. Little P, Stuart B, Mullee M, et al. Effectiveness of steam inhalation and nasal  
21 irrigation for chronic or recurrent sinus symptoms in primary care: a pragmatic randomized  
22 controlled trial. *CMAJ : Canadian Medical Association journal = journal de l'Association*  
23 *medicale canadienne* 2016; 188: 940-949. 2016/07/20. DOI: 10.1503/cmaj.160362.  
24  
25
- 26 21. Little P, Leydon G, Thomas T, et al. 'Well, it literally stops me from having a life when  
27 it's really bad': a nested qualitative interview study of patient views on the use of self-  
28 management treatments for the management of recurrent sinusitis (SNIFS trial). *BMJ Open*  
29 2017.  
30
- 31 22. Soni-Jaiswal A, Philpott C and Hopkins C. The impact of commissioning for  
32 rhinosinusitis in England. *Clin Otolaryngol* 2015; 40: 639-645. DOI: 10.1111/coa.12430.  
33  
34
- 35 23. Hopkins C, Rimmer J and Lund VJ. Does time to endoscopic sinus surgery impact  
36 outcomes in Chronic Rhinosinusitis? Prospective findings from the National Comparative  
37 Audit of Surgery for Nasal Polyposis and Chronic Rhinosinusitis. *Rhinology* 2015; 53: 10-17.  
38 DOI: 10.4193/Rhin13-217.  
39
- 40 24. Benninger MS, Sindwani R, Holy CE, et al. Impact of medically recalcitrant chronic  
41 rhinosinusitis on incidence of asthma. *International forum of allergy & rhinology* 2016; 6:  
42 124-129. 2015/12/02. DOI: 10.1002/alr.21652.  
43  
44
- 45 25. Hopkins C, Slack R, Lund V, et al. Long-term outcomes from the English national  
46 comparative audit of surgery for nasal polyposis and chronic rhinosinusitis. *Laryngoscope*  
47 2009; 119: 2459-2465. DOI: 10.1002/lary.20653.  
48
- 49 26. Philpott C, Hopkins C, Erskine S, et al. The burden of revision sinonasal surgery in the  
50 UK-data from the Chronic Rhinosinusitis Epidemiology Study (CRES): a cross-sectional study.  
51 *BMJ Open* 2015; 5: e006680. DOI: 10.1136/bmjopen-2014-006680.  
52  
53  
54  
55  
56  
57  
58  
59  
60

1  
2  
3 27. Hopkins C, Browne JP, Slack R, et al. The national comparative audit of surgery for  
4 nasal polyposis and chronic rhinosinusitis. *Clinical Otolaryngology* 2006; 31: 390-398. DOI:  
5 10.1111/j.1749-4486.2006.01275.x.  
6  
7  
8  
9  
10  
11  
12  
13  
14  
15  
16  
17  
18  
19  
20  
21  
22  
23  
24  
25  
26  
27  
28  
29  
30  
31  
32  
33  
34  
35  
36  
37  
38  
39  
40  
41  
42  
43  
44  
45  
46  
47  
48  
49  
50  
51  
52  
53  
54  
55  
56  
57  
58  
59  
60

For peer review only



## Appendix 1

### GP/ENT SPECIALIST INTERVIEW GUIDE

#### Section 1: Experiences with and diagnosing patients with chronic Rhinosinusitis (CRS)

- To start us off, I just want to ask you some specific questions about your experience of seeing patients who have chronic rhinosinusitis.
  - *Prompt:* understanding of the term chronic rhinosinusitis (CRS).
  - *Prompt:* how many patients.
  - *Prompt:* for any challenges
- Please talk me through the approach that you use to help decide whether a patient has CRS?
  - *Prompt:* for any challenges
  - *Prompt:* for views on any diagnostic criteria if aware of them.
  - *Prompt:* for familiarity with the different sub-categories of CRS (CRS with polyps, CRS without polyps).
  - *Prompt:* for any investigations or diagnostic tests.

#### Section 2: Experiences and views on treatment options for patients with CRS

##### GP views:

- Please talk me through your experience of treating patients with CRS
  - *Prompt:* for any challenges
  - *Prompt:* for any treatments you may initiate for patients with CRS
- What is your view of these treatments for managing CRS
  - *Prompt:* for antibiotics (standard short term antibiotics – such as 1-2 week courses, versus long term courses) nasal steroid sprays/drops/oral steroids and nasal douching/saline irrigations.
  - *Prompt:* for patient pressure for antibiotics
  - *Prompt:* for how they assess response to treatment
- How would you decide whether to, and when to refer/not refer your patient to a specialist?
- What is your view of the role of surgery in CRS?
- What is your preferred method of keeping up to date with the current evidence base for CRS

- *Prompt:* for how they keep up with evidence (journals, conferences, peer meetings).
- *Prompt:* for view of evidence base

### ENT specialist views:

- Please talk me through your experience of treating patients with CRS
  - *Prompt:* for any challenges
  - *Prompt:* for any treatments you may initiate for patients with CRS
- What is your view of these treatments for managing CRS
  - *Prompt:* for antibiotics (standard short term antibiotics – such as 1-2 week courses, versus long term courses) nasal steroid sprays/drops/oral steroids and nasal douching/saline irrigations.
  - *Prompt:* for how they assess response to treatment
- What is your view of the role of surgery for managing CRS
  - *Prompt:* for how they decide who to list for surgery
  - *Prompt:* for how they assess response to treatment
  - *Prompt:* How long they follow up CRS patients in clinic
- What is your preferred method of keeping up to date with the current evidence base for CRS
  - *Prompt:* for how they keep up with evidence (journals, conferences, peer meetings).
  - *Prompt:* for view of evidence base
- What is your view of the referrals that you get from GPs
  - *Prompt:* for the timing and quality of GP referrals received
  - *Prompt:* for too many or too few CRS referrals?

### Section 3: Views on use and knowledge of guidelines

- What are your views of aids to diagnosis and the treatment and management of CRS, such as diagnostic criteria and guidelines?
  - *Prompt:* for guidelines (local or national)
  - *Prompt:* for familiarity and usefulness of the commissioning guidelines from the Royal College of Surgeons of England/ENT UK?
  - *Prompt:* knowledge of any other local guidelines that their CCG may adhere to
  - *Prompt:* for any other local guidance, such as peer support
  - *Prompt:* for guidance sought from research evidence

## COREQ (COnsolidated criteria for REporting Qualitative research) Checklist

A checklist of items that should be included in reports of qualitative research. You must report the page number in your manuscript where you consider each of the items listed in this checklist. If you have not included this information, either revise your manuscript accordingly before submitting or note N/A.

| Topic                                          | Item No. | Guide Questions/Description                                                                                                                              | Reported on Page No. |
|------------------------------------------------|----------|----------------------------------------------------------------------------------------------------------------------------------------------------------|----------------------|
| <b>Domain 1: Research team and reflexivity</b> |          |                                                                                                                                                          |                      |
| <i>Personal characteristics</i>                |          |                                                                                                                                                          |                      |
| Interviewer/facilitator                        | 1        | Which author/s conducted the interview or focus group?                                                                                                   |                      |
| Credentials                                    | 2        | What were the researcher's credentials? E.g. PhD, MD                                                                                                     |                      |
| Occupation                                     | 3        | What was their occupation at the time of the study?                                                                                                      |                      |
| Gender                                         | 4        | Was the researcher male or female?                                                                                                                       |                      |
| Experience and training                        | 5        | What experience or training did the researcher have?                                                                                                     |                      |
| <i>Relationship with participants</i>          |          |                                                                                                                                                          |                      |
| Relationship established                       | 6        | Was a relationship established prior to study commencement?                                                                                              |                      |
| Participant knowledge of the interviewer       | 7        | What did the participants know about the researcher? e.g. personal goals, reasons for doing the research                                                 |                      |
| Interviewer characteristics                    | 8        | What characteristics were reported about the interviewer/facilitator? e.g. Bias, assumptions, reasons and interests in the research topic                |                      |
| <b>Domain 2: Study design</b>                  |          |                                                                                                                                                          |                      |
| <i>Theoretical framework</i>                   |          |                                                                                                                                                          |                      |
| Methodological orientation and Theory          | 9        | What methodological orientation was stated to underpin the study? e.g. grounded theory, discourse analysis, ethnography, phenomenology, content analysis |                      |
| <i>Participant selection</i>                   |          |                                                                                                                                                          |                      |
| Sampling                                       | 10       | How were participants selected? e.g. purposive, convenience, consecutive, snowball                                                                       |                      |
| Method of approach                             | 11       | How were participants approached? e.g. face-to-face, telephone, mail, email                                                                              |                      |
| Sample size                                    | 12       | How many participants were in the study?                                                                                                                 |                      |
| Non-participation                              | 13       | How many people refused to participate or dropped out? Reasons?                                                                                          |                      |
| <i>Setting</i>                                 |          |                                                                                                                                                          |                      |
| Setting of data collection                     | 14       | Where was the data collected? e.g. home, clinic, workplace                                                                                               |                      |
| Presence of non-participants                   | 15       | Was anyone else present besides the participants and researchers?                                                                                        |                      |
| Description of sample                          | 16       | What are the important characteristics of the sample? e.g. demographic data, date                                                                        |                      |
| <i>Data collection</i>                         |          |                                                                                                                                                          |                      |
| Interview guide                                | 17       | Were questions, prompts, guides provided by the authors? Was it pilot tested?                                                                            |                      |
| Repeat interviews                              | 18       | Were repeat interviews carried out? If yes, how many?                                                                                                    |                      |
| Audio/visual recording                         | 19       | Did the research use audio or visual recording to collect the data?                                                                                      |                      |
| Field notes                                    | 20       | Were field notes made during and/or after the interview or focus group?                                                                                  |                      |
| Duration                                       | 21       | What was the duration of the interviews or focus group?                                                                                                  |                      |
| Data saturation                                | 22       | Was data saturation discussed?                                                                                                                           |                      |
| Transcripts returned                           | 23       | Were transcripts returned to participants for comment and/or                                                                                             |                      |

| Topic                                  | Item No. | Guide Questions/Description                                                                                                        | Reported on Page No. |
|----------------------------------------|----------|------------------------------------------------------------------------------------------------------------------------------------|----------------------|
|                                        |          | correction?                                                                                                                        |                      |
| <b>Domain 3: analysis and findings</b> |          |                                                                                                                                    |                      |
| <i>Data analysis</i>                   |          |                                                                                                                                    |                      |
| Number of data coders                  | 24       | How many data coders coded the data?                                                                                               |                      |
| Description of the coding tree         | 25       | Did authors provide a description of the coding tree?                                                                              |                      |
| Derivation of themes                   | 26       | Were themes identified in advance or derived from the data?                                                                        |                      |
| Software                               | 27       | What software, if applicable, was used to manage the data?                                                                         |                      |
| Participant checking                   | 28       | Did participants provide feedback on the findings?                                                                                 |                      |
| <i>Reporting</i>                       |          |                                                                                                                                    |                      |
| Quotations presented                   | 29       | Were participant quotations presented to illustrate the themes/findings?<br>Was each quotation identified? e.g. participant number |                      |
| Data and findings consistent           | 30       | Was there consistency between the data presented and the findings?                                                                 |                      |
| Clarity of major themes                | 31       | Were major themes clearly presented in the findings?                                                                               |                      |
| Clarity of minor themes                | 32       | Is there a description of diverse cases or discussion of minor themes?                                                             |                      |

Developed from: Tong A, Sainsbury P, Craig J. Consolidated criteria for reporting qualitative research (COREQ): a 32-item checklist for interviews and focus groups. *International Journal for Quality in Health Care*. 2007. Volume 19, Number 6: pp. 349 – 357

**Once you have completed this checklist, please save a copy and upload it as part of your submission. DO NOT include this checklist as part of the main manuscript document. It must be uploaded as a separate file.**

# BMJ Open

## Management strategies for chronic rhinosinusitis: A qualitative study of GP and ENT specialist views of current practice in the UK.

|                                 |                                                                                                                                                                                                                                                                                                                                                                                                                                                                                                                                                                                                                                                                                                        |
|---------------------------------|--------------------------------------------------------------------------------------------------------------------------------------------------------------------------------------------------------------------------------------------------------------------------------------------------------------------------------------------------------------------------------------------------------------------------------------------------------------------------------------------------------------------------------------------------------------------------------------------------------------------------------------------------------------------------------------------------------|
| Journal:                        | <i>BMJ Open</i>                                                                                                                                                                                                                                                                                                                                                                                                                                                                                                                                                                                                                                                                                        |
| Manuscript ID                   | bmjopen-2018-022643.R1                                                                                                                                                                                                                                                                                                                                                                                                                                                                                                                                                                                                                                                                                 |
| Article Type:                   | Research                                                                                                                                                                                                                                                                                                                                                                                                                                                                                                                                                                                                                                                                                               |
| Date Submitted by the Author:   | 14-Aug-2018                                                                                                                                                                                                                                                                                                                                                                                                                                                                                                                                                                                                                                                                                            |
| Complete List of Authors:       | Vennik, Jane; University of Southampton , Primary Care and Population Sciences<br>Eyles, Caroline; University of Southampton, Primary Care and Population Sciences<br>Thomas, Mike; University of Southampton, Primary Care and Population Sciences<br>Hopkins, claire; Guys Hospital, ENT<br>Little, Paul; University of Southampton, Primary Care and Population Science<br>Blackshaw, Helen; UCL Ear Institute, evidENT<br>Schilder, Anne; University College London Ear Institute<br>Boardman, Jim; Fifth Sense: the charity of people with smell and taste disorders<br>Philpott, Carl; University of East Anglia,, Norwich Medical School; James Paget University Hospitals NHS Foundation Trust |
| <b>Primary Subject Heading</b>: | Ear, nose and throat/otolaryngology                                                                                                                                                                                                                                                                                                                                                                                                                                                                                                                                                                                                                                                                    |
| Secondary Subject Heading:      | General practice / Family practice, Qualitative research                                                                                                                                                                                                                                                                                                                                                                                                                                                                                                                                                                                                                                               |
| Keywords:                       | QUALITATIVE RESEARCH, Sinusitis, Sinus surgery, ENT views, GP views                                                                                                                                                                                                                                                                                                                                                                                                                                                                                                                                                                                                                                    |
|                                 |                                                                                                                                                                                                                                                                                                                                                                                                                                                                                                                                                                                                                                                                                                        |

SCHOLARONE™  
Manuscripts

## Title

Management strategies for chronic rhinosinusitis: A qualitative study of GP and ENT specialist views of current practice in the UK.

---

## Authorship

Jane Vennik<sup>1</sup>, Caroline Eyles<sup>1</sup>, Mike Thomas<sup>1</sup>, Claire Hopkins<sup>2</sup>, Paul Little<sup>1</sup>, Helen Blackshaw<sup>3</sup>, Anne Schilder<sup>3</sup>, Jim Boardman<sup>4</sup>, Carl Philpott<sup>5,6</sup>.

<sup>1</sup> Primary Care and Populations Sciences, Faculty of Medicine, University of Southampton, Aldermoor Close, Southampton. SO16 5ST

<sup>2</sup> Guy's and St. Thomas' NHS Foundation Trust

<sup>3</sup> evidENT, University College London

<sup>4</sup> Fifth Sense: a charity for people with smell and taste disorders

<sup>5</sup> Norwich Medical School, University of East Anglia, Norwich. NR4 7TJ

<sup>6</sup> James Paget University Hospital NHS Foundation Trust, Gorleston, NR31 6LA

## Corresponding Author

Dr J Vennik

[j.vennik@soton.ac.uk](mailto:j.vennik@soton.ac.uk)

Word count: 3378 without quotes, (4585 with quotes)

## Abstract

### Objectives:

To explore GP and ENT specialist perspectives of current treatment strategies for chronic rhinosinusitis (CRS) and care pathways through primary and secondary care.

### Design:

Semi-structured qualitative telephone interviews as part of the MACRO programme.

### Setting

Primary care and secondary care ENT outpatient clinics in the UK

### Participants

Twelve GPs and 9 ENT specialists consented to in-depth telephone interviews. Transcribed recordings were managed using NVivo software and analysed using inductive thematic analysis

### Main outcome measures

Healthcare professional views of management options and care pathways for CRS.

### Results

GPs describe themselves as confident in recognising CRS, with the exception of assessing nasal polyps. In contrast, specialists report common missed diagnoses (e.g. allergy; chronic headache) when patients are referred to ENT clinics, and attribute this to the limited ENT training of GPs. Steroid nasal sprays provide the foundation of treatment in primary care, although local prescribing restrictions can affect treatment choice and poor adherence is perceived to be the causes of inadequate symptom control. Symptom severity, poor response to medical treatment, and patient pressure drive referral, although there is uncertainty about optimal timing. Treatment decisions in secondary care are based on disease severity, polyp status, prior medical treatment and patient choice, but there is major uncertainty about the place of longer courses of antibiotics and the use of oral steroids. Surgery is regarded as an important treatment option for patients with severe symptoms or with nasal polyps, although timing of surgery remains unclear, and the uncertainty about net longer term benefits of surgery makes balancing of benefits and risks more difficult.

### Conclusions

Clinicians are uncertain about best management of patients with CRS in both primary and secondary care and practice is varied. An integrated care pathway for CRS is needed to improve patient management and timely referral.

## Strengths and limitations

- The interviews permitted exploration of diagnosis, treatment and management strategies for patients with CRS through primary and secondary care.
- The inclusion of generalist and specialist views helped to provide a better understanding of CRS management from multiple perspectives. However, it is possible that our sample of clinicians were particularly interested in CRS or research of this nature and thus their views may not represent those of the non-respondents.
- Participants were sampled from different geographical areas of England and Scotland, enhancing transferability of the study findings.
- Patient views and experiences are not included but are presented elsewhere.

## Introduction

Chronic rhinosinusitis (CRS) is a prevalent chronic inflammatory condition of the nose and paranasal sinuses which significantly affects the health and quality of life of patients<sup>1, 2</sup>, and contributes a significant burden to NHS healthcare resources. CRS is defined in the European Position Paper on Rhinosinusitis (EPOS 2012)<sup>3</sup> by the presence of at least two symptoms, one of which must be either nasal congestion or nasal discharge together with facial pain/pressure and/or anosmia lasting for more than 12 weeks. This is then further qualified by the presence (CRSwNP) or absence of nasal polyps (CRSSNP). Based on the symptom and duration definition alone, prevalence rates are estimated at 10% in the UK<sup>4</sup>. Longitudinal data from the Clinical Practice Research Datalink (CPRD) suggests that 1% of British adults receive treatment each year in primary care, resulting in multiple GP consultations and medical prescriptions<sup>5</sup>. There is significant onward referral to specialist ENT services leading to 120,000 outpatient appointments and 40,000 sinus operations annually in England and Wales<sup>6</sup>.

To date there are no NICE guidelines for managing patients with CRS. International<sup>7</sup> and European (EPOS) guidelines<sup>3</sup> are present, however, awareness and uptake in UK practice is unclear. Commissioning guidelines<sup>8</sup> for management of rhinosinusitis were developed in collaboration with the Royal College Of Surgeons England and NICE, but local compliance with guidelines is variable and access to specialist care is restricted in some areas. Intranasal corticosteroids (INCS) and nasal irrigation are strongly recommended based on high-quality evidence<sup>9-11</sup>, however there are uncertainties about uptake and compliance in primary care. Most GP consultations for acute or chronic rhinosinusitis result in an antibiotic prescription despite insufficient evidence for routine use<sup>12</sup>. Uncertainties in secondary care result in a 5-fold variation in surgical rates around the UK<sup>6</sup> and there is conflicting evidence for the use of long-term antibiotics<sup>13</sup>.



1  
2  
3 The views and experiences of healthcare professionals involved in the CRS patient pathway  
4 have yet to be investigated in depth. As yet, no studies have explored GP practice variation  
5 in terms of knowledge of the guidelines, treatment decisions and referral criteria, and there  
6 is limited understanding of ENT specialist views and experiences of treating patients with  
7 CRS.  
8  
9

10 MACRO (Defining best Management for Adults with Chronic Rhinosinusitis)<sup>14</sup> is an NIHR  
11 funded programme of research designed to establish best practice for CRS management in  
12 adults across primary and secondary care. This paper reports a qualitative interview study,  
13 conducted as part of the MACRO programme, exploring GP and ENT specialist views of  
14 current treatment strategies and care pathways for CRS patients through primary and  
15 secondary care.  
16  
17  
18

## 19 **Methods**

### 20 **Design**

21  
22 A qualitative interview study was conducted with a purposeful sample of GPs and ENT  
23 specialists between January and April 2017.  
24  
25  
26  
27

### 28 **Participants and procedures**

29  
30 GPs were approached through the NIHR Clinical Research Network (CRN) in regions of  
31 Wessex, Eastern and South East England. Fifteen interested GPs with experience of treating  
32 patients with CRS responded to the study team and were purposefully sampled for a range  
33 of characteristics including gender, GP experience, practice location and practice population  
34 demographics.  
35  
36  
37  
38

39 ENT specialists with experience of treating patients with CRS were recruited through an  
40 email to the membership of ENT-UK (the professional body representing ENT surgeons).  
41 Thirty-one ENT specialists from England and Scotland expressed an interest in participating  
42 and were purposefully sampled for a range of demographics (location, time in practice) and  
43 ENT sub-speciality interest (including generalists and rhinologists).  
44  
45  
46

### 47 **Interviews**

48  
49 A trained interviewer (JV) conducted semi-structured telephone interviews with participants  
50 each lasting approximately 25-55 minutes. JV (female) is a postdoctoral research fellow for  
51 the MACRO programme, trained in qualitative research methods and with previous  
52 experience of ENT and primary care research, who was not previously known to the  
53 interview participants. Telephone interviews were employed to allow inclusion of  
54  
55  
56  
57

1  
2  
3 participants from a wide geographical area. Each participant gave verbal consent prior to  
4 commencing the interview. An interview guide (Appendix 1) was developed through  
5 collaboration and input from the wider MACRO research team, and subsequently piloted  
6 with an ENT specialist and minor modifications made to reflect any issues that arose. The  
7 guide was used to direct but not constrain the interviews and was sufficiently flexible to  
8 allow exploration of unexpected topics and themes. Field notes were used to facilitate  
9 interpretation and contextualisation of the interviews.  
10  
11

12  
13 GPs and ENT specialists were asked open-ended questions about their views of the  
14 diagnosis and management of CRS, knowledge and implementation of CRS guidelines,  
15 perceptions of the evidence base and experiences of practical decision-making in the  
16 management of patients with CRS. The interviews were audio-recorded and transcribed  
17 verbatim in preparation for analysis. Our epistemological position is one of subtle realism,  
18 and a pragmatic approach was adopted in this study.  
19  
20

## 21 22 **Analysis**

23  
24  
25 Inductive thematic analysis<sup>15</sup> was used to analyse the interview transcripts, using NVIVO 11  
26 to facilitate data management. Each participant group (GPs and ENT surgeons) were  
27 analysed independently. Each analysis commenced with familiarisation and immersion in  
28 the data itself, leading to identification of initial patterns and themes within the data set.  
29 Descriptive codes were then used to label sections of the data. A number of transcripts  
30 were coded by more than one researcher (JV and CE) which brings multiple perspectives to  
31 the analysis and provides an opportunity to discuss coding decisions at an early stage.  
32 Codes were then developed and refined as analysis progressed, and where uncertainties  
33 arose, team discussions facilitated agreement and adjustment. These codes were then  
34 linked together, grouped, refined and re-labelled resulting in a set of themes and sub-  
35 themes for each participant group. Following an iterative process of comparing and  
36 contrasting the two datasets, a set of overarching themes and sub-themes were developed  
37 which systematically and thoroughly explained the data. Data collection and analysis took  
38 place concurrently, and interviews continued until data saturation was achieved.  
39  
40  
41  
42  
43  
44

## 45 **Patient involvement**

46  
47  
48 A patient contributor (JB) from the MACRO programme management group provided input  
49 into the design of the study from the patient perspective, and contributed to the  
50 development of the interview topic guide.  
51  
52  
53  
54  
55  
56

## Results

### Participants

A total of 12 GPs participated in the study. 8 (76%) were male with median duration in general practice of 20 years (range 2-29). Included GPs were from rural and urban practices, from areas of differing social deprivation. Nine ENT specialists including general ENT surgeons and rhinologists also took part in a research interview; 8 were male with a median time on the specialist register of 19 years (range 8-21). Full details are presented in table 1.

Table 1: Participant characteristics

| <b>GP Characteristics</b>                                                                      | <b>N=12</b>         |
|------------------------------------------------------------------------------------------------|---------------------|
| Years in general practice (median, range)                                                      | 20 (2-29)           |
| Male                                                                                           | 8                   |
| Practice list size mean (range)                                                                | 9967 (4758 - 18571) |
| Practice deprivation decile<br>(where 1 is most deprived, 10 is least deprived) median (range) | 9 (3-10)            |
| Practice location                                                                              |                     |
| – Rural town and fringe                                                                        | 4                   |
| – Rural village and dispersed                                                                  | 1                   |
| – Urban city and town                                                                          | 4                   |
| – Urban major conurbation                                                                      | 3                   |
| <b>ENT specialist characteristics</b>                                                          | <b>N=9</b>          |
| Time (years) on specialist register (Otolaryngology) (median, range)                           | 19 (8-21)           |
| Male                                                                                           | 8                   |
| Sub-specialisation                                                                             |                     |
| – General ENT surgeon                                                                          | 3                   |
| – Special interest in rhinology                                                                | 4                   |
| – Consultant rhinologist                                                                       | 2                   |
| Location                                                                                       |                     |
| – Yorkshire and Humberside                                                                     | 1                   |
| – Midlands                                                                                     | 1                   |
| – London                                                                                       | 1                   |
| – South East                                                                                   | 4                   |
| – Scotland                                                                                     | 2                   |

## **Themes**

Thematic analysis identified 4 main themes relating to the management of patients with CRS (Table 2). Quotations are presented to illustrate the themes and sub-themes, with details of the participants presented in parentheses.

**Table 2: Themes and sub-themes**

| <b>Theme</b>                   | <b>Sub-theme</b>                                                                                                                                                     |
|--------------------------------|----------------------------------------------------------------------------------------------------------------------------------------------------------------------|
| 1. Diagnostic uncertainties    | <ul style="list-style-type: none"> <li>• Reaching a diagnosis</li> <li>• Distinguishing between sub-groups</li> </ul>                                                |
| 2. Selecting best management   | <ul style="list-style-type: none"> <li>• Treatment decisions</li> <li>• Initiation treatment in primary care</li> <li>• Further medical treatment options</li> </ul> |
| 3. Decision-making for surgery | <ul style="list-style-type: none"> <li>• Implementing guidelines</li> <li>• Value of sinus surgery</li> <li>• Joint decision-making</li> </ul>                       |
| 4. Transition of care          | <ul style="list-style-type: none"> <li>• Factors affecting referral</li> <li>• Quality of referral</li> </ul>                                                        |

### **Theme 1: Diagnostic uncertainties**

#### **Reaching a diagnosis**

GPs describe themselves as confident in recognising CRS, making a diagnosis based on patient-reported history of symptoms and impact on quality of life, together with a basic physical examination of the nose. Duration of symptoms was described as an important diagnostic factor, although there is some uncertainty in primary care about the definition of chronicity.

---

*Then I guess really the diagnosis comes down to the time course more than anything. Assuming that that cluster of symptoms is present, it comes down to the time course. (GP 04)*

---

On the contrary, ENT specialists describe primary care diagnosis of CRS as of variable quality and precision, with many patients presenting at ENT clinics with a misdiagnosis.

---

*So I think, therefore, their diagnostic ability for ENT conditions, broadly, and rhinosinusitis in particular, can be very poor (ENT 01)*

---

1  
2  
3 Uncertainties can arise when symptoms overlap with other conditions, such as chronic  
4 headaches and allergic rhinitis, which can lead to patients receiving ineffective treatments.  
5

---

6  
7  
8 *We see lots of patients who are referred with “recurrent sinus infections”*  
9 *where their main presenting symptom may be facial pain or headache, and*  
10 *most of those patients, in my experience, with those symptoms, don't have*  
11 *rhinosinusitis. (ENT 02)*  
12

---

13  
14 ENT specialists also describe a diagnostic challenge where there is a dissociation between  
15 patient symptom history and clinical findings.  
16

---

17  
18 *There's a well-defined group of patients who have symptoms which are on*  
19 *history virtually indistinguishable from CRS who actually have nothing on*  
20 *nasal endoscopy, in other words completely normal nasal endoscopy, and*  
21 *when the CT scan comes back that's completely normal as well (ENT 05)*  
22  
23

---

## 24 25 26 **Distinguishing between sub-groups** 27

28  
29 GPs report some difficulties in diagnosing patients with nasal polyps unless polyps are visible  
30 in the nasal cavity, due to the lack of diagnostic equipment in primary care.  
31

---

32  
33 *Yes, with polyps, on the outset, if we have a patient with these symptoms,*  
34 *to sort of diagnose polyps is very difficult for us unless they've got a*  
35 *previous diagnosis (GP 08)*  
36  
37

---

38  
39 In contrast, ENT specialists report the diagnosis of CRS without nasal polyps to be more  
40 challenging particularly when there is an absence of clinical findings on examination.  
41

---

42  
43 *The diagnosis of chronic rhinosinusitis without nasal polyps is really, really*  
44 *difficult. As I say, some of them will actually have pus dripping from their*  
45 *sinus into the nose, and that's very easy, but the majority of them don't*  
46 *have that at all. (ENT 08)*  
47  
48

---

## Theme 2: Selecting best management

### Treatment decisions

GPs report using local guidelines, journal articles, online learning modules and GP educational sessions to keep up to date with current practices. However, GP update courses are described as often too general and cover a broad range of topics. Events provided by the local ENT department were described as extremely useful but were infrequent.

---

*I tend to do a lot of online stuff, so I'll look at BMJ or RCGP learning. Sometimes, we get local events. We've not had a local ENT event recently, but we do get local consultants or specialist nurses, sometimes, come out and give us updates and guidelines. (GP 05)*

---

GPs also describe ENT clinic letters as useful and informative about current practice for managing patients with CRS.

---

*You get a flavour of reading letters and so you get an idea of what they recommend in their letters. (GP 09)*

---

Nonetheless, ENT specialists expressed opinion that GPs have limited ENT training and some are poorly trained to recognise and understand symptoms and pathology of CRS.

---

*Most GPs have never done any ENT jobs, ever, in their training. Most medical students don't get any ENT teaching, or very minimal ENT teaching, so you then have a sub-set of GPs who don't know any ENT unless it's what they've been told by their GP colleagues on the odd course they go to. (ENT 01)*

---

### Initiating treatment in primary care

Intranasal corticosteroids (INCS) were commonly described as first line treatment for patients with CRS, with the choice often associated with GP preference and experience. However, some GPs describe local prescribing restrictions where they are directed to prescribe lower cost nasal sprays such as beclomethasone, instead of more costly fluticasone, in the first instance.

---

*There will pop up a box [on our computers] saying, 'This costs this much, why don't you use this one which costs only this much?' So we're constantly reminded to use cost effective things. (GP 02)*

---

However, both GPs and ENT specialists suggested that patients did not always apply their nasal sprays correctly or did not comply with the treatment regimen over a longer period of time.

---

*It's quite obvious that they have been sniffing too much and it's gone all the way to the back of the throat, and they're using it incorrectly, maybe because no one informed them of how to use it in the past. (GP 06)*

---

GPs describe prescribing short courses of antibiotics for patients with acute infection, purulent discharge, febrile patients, and for those who are most severely affected. However, some GP report feeling pressured by patients to prescribe antibiotics especially if symptoms are particularly severe or the patient has responded to antibiotics in a previous episode.

---

*The biggest challenge is patients wanting antibiotics because they think that will cure everything! (GP 05)*

---

Most GPs reported limited use of saline irrigation in primary care. Despite recommendations from ENT, GPs were unfamiliar with the evidence and therefore unlikely to recommend them to patients, or patients were concerned about the cost of proprietary preparations.

---

*ENT doctors recommend it [saline irrigation] to patients, but that's not something I'd recommend myself....I just wasn't aware if it was evidence-based, or if it was something we should be recommending (GP 09).*

---

### **Further medical treatment options**

Some ENT specialists report the use of long term antibiotics for patients with CRS, although there is uncertainty about which patients might benefit and the optimum length of treatment.

---

*I think the issue is about what is the role of long-term antibiotics in rhinosinusitis and particularly the clarithromycin group of antibiotics? It is something I am aware of being used increasingly and I do now use in some patients (ENT 02).*

---

There is a mixed opinion about whether long-term antibiotics are appropriate for CRS patients with nasal polyps, with some ENT specialists describing them as ineffective, and a lack of evidence for their routine use. Others, however, recount prescribing low dose antibiotics alongside oral steroids for nasal polyps prior to consideration for surgery.

---

*I don't use clarithromycin for polyps. I know some people do but I don't because from my reading of the literature and all that I don't really see any of the benefit; (ENT07).*

---

Most GPs reported being unfamiliar with long term antibiotic use for CRS in primary care, and some were concerned about the potential for side effects.

---

*I don't have any experience of it. I'm not keen on long term courses of antibiotics, for this particular condition. (GP 07)*

---

GPs described infrequent use of oral steroids in primary care. ENT specialists report the use of oral steroids in the pre-operative pathway for patients with polyp disease. A rescue course of oral steroids is sometimes used for severe patients when symptoms are uncontrolled. Oral steroids were reported as rarely recommended for patients without nasal polyps.

---

*I think most people would say that the polyp group need a lot more oral steroid and a lot less antibiotic, and the non-polyp group need a lot less steroid and a lot more antibiotic, in general terms. (ENT08)*

---

### **Theme 3: Decision-making for surgery**

#### **Implementing guidelines**

ENT specialists keep up to date with current practices in CRS by reading rhinology journals and attending ENT conferences. All ENT specialists were familiar with the EPOS guidelines and described them as a good source of evidence for diagnosis and treatment decisions, although most general ENT surgeons did not refer to them on a daily basis.



---

*So generally EPOS guidelines are probably the thing that I pay the most attention to. (ENT09)*

---

### **Value of sinus surgery**

ENT specialists describe sinus surgery as an important treatment for patients with severe disease, and when medical treatment options have been explored.

---

*Well, I think the patients at the more severe end of the spectrum, I think it offers them the best chance of a long-term improvement in symptoms. (ENT 05)*

---

Similarly, GPs viewed sinus surgery as a treatment option which should be reserved for more severe patients who have tried all available medical treatments.

---

*I think there is a role for surgery but I'm not someone who likes intervention. So, I would, initially, try all the things, the nasal therapies, basically, to see if that does the job first. Surgery is a last resort, for me. (GP 07)*

---

However, some specialists describe uncertainties about the value of a surgical intervention for an inflammatory condition.

---

*I'm not intellectually massively impressed by it, if I'm absolutely honest with you, the idea of doing an operation to help a mucosal inflammatory problem (ENT 08)*

---

ENT specialists identify the role of surgery in polyp disease and report prioritising these patients for surgical intervention.

---

*The severe polyp patients, the ones who are completely bunged up, I wouldn't bother with any of the medical therapy. I just put them on my operating list for surgery (ENT 05)*

---

Both GPs and specialists view surgery as a temporary rather than permanent solution for CRS. ENT specialists recount that most patients require ongoing medical treatment to manage symptoms after surgery, and GPs describe surgery as rarely a long-term solution for patients with CRS.

---

*I mean I think it's rare that surgery is curative for those people, I would say, they don't just go and have one operation and never have any problems with their nose and sinuses for the rest of their life! These patients come back and back, even when they've had surgery. (GP 02)*

---

### **Joint decision-making**

ENT specialists reported that decision-making for surgery is made jointly with the patient after all treatment options, risks and potential benefits have been discussed.

---

*It's very much up to the patients. Our patients are a very switched on bunch of people. They totally like to be involved in their decision, (ENT 09)*

---

However, both GPs and ENT specialists recognise that some patients have a high expectation for surgery whilst others express a reluctance for surgery, especially repeat surgery.

---

*Then there are some people who definitely want surgery from the outset, and don't want to have medical therapy, and they're difficult to manage because they won't accept a trial of medical therapy, because they've had antibiotics before and they've had those sprays and those drops, and they don't work, (ENT 01)*

---

Some GPs describe advising patients against surgery due to the possible complications, side effects and potentially limited benefits.

---

*I tend to counsel people fairly strongly against having sinus surgery because I just don't believe it's a long-term benefit in the vast majority of cases (GP 04)*

---

Both GPs and ENT specialists recognise the potential risks of sinus surgery and describe the importance of balancing these against uncertain symptomatic relief for patients.

---

*ENT surgery is painful, causes people to have a lot of time off work and may not yield high benefit and may make the problem worse. So I would have thought that that should come at a later stage, so not to cause harm (GP 01).*

---

## Theme 4: Transition of care

### Factors affecting referral

GPs use their clinical judgement when deciding either to continue to manage a patient in primary care or to refer for specialist opinion and further treatment options. The impact of symptoms on a patient's quality of life and response to medical treatments were recognised by GPs as important factors for referral.

---

*It really hinges, I think, on whether they're getting better with the simple treatment that we've put in place. If they're not getting better and it's affecting them and having effect on their functioning and their quality of life, then I would refer them. (GP 11)*

---

GPs explained that patients with visible nasal polyps and those with structural abnormalities were prioritised for referral due to the potential need for surgical intervention.

---

*I would refer someone if they had obstructing polyps that hadn't responded to medical polypectomy, assuming that they wanted to have a surgical polypectomy, (GP 04)*

---

Some GPs report patient pressure for early referral, although many GPs report giving patients the choice about continued treatment in primary care or referral for a specialist opinion.

---

*In some instances where they're adamant that they want to see a specialist, then we've had to write directly to the clinic and bypassing the referral to say that specifically this patient is wanting to see a specialist. (GP 08)*

---

Many GPs were unaware of local referral guidelines for CRS and based their decision for referral on personal experience. However, others described a referral triage system or a local referral support service who screen the referral against local guidelines.

---

*So, for the referral form, the guidelines are actually attached to that. So, at the point of referral, you can actually have a look at that and see if this patient fits or if there is more for you to do before it gets to ENT. (GP 07)*

---

## **Quality of referral**

ENT specialists report wide variation in the timing and quality of GP referrals to secondary care. Some specialists observed a delay in referral when symptoms are severe and suggest that earlier referral would be easier to treat and result in better outcomes for patients.

---

*So I quite frequently see patients that have suffered symptoms for many months, if not years. It's a very frequent comment that I get from patients, saying I've been trying to get referred to a specialist for ages and ages and they just won't refer me and they just give me nose drops and sprays. (ENT 05)*

---

Equally, other specialists report cases of premature referral, when patients have not received maximal available medical treatment in primary care.

---

*I think I might criticise them for referring too presumptuously because I think we do get referrals from GPs who haven't actually even initiated medical therapy. (ENT 02)*

---

## **Discussion**

### **Synopses of key findings**

This study explored GPs and ENT specialist views of current practice for managing patients with CRS. GPs describe themselves as confident in recognising CRS with the exception of nasal polyps, however, surgeons report common missed diagnoses when patients are referred to ENT clinics and attribute this to the limited ENT training of GPs and lack of available diagnostic tests or equipment. Local prescribing restrictions can affect choice of INCS in primary care and poor adherence is perceived to be the causes of inadequate symptom control. Symptom severity, poor response to medical treatment and patient pressure drives referral, although there is lack of clarity about optimal timing. ENT clinic letters are a valuable information source for GPs and ENT training courses are useful but infrequent. Treatment decisions in secondary care are based on disease severity, polyp status, prior medical treatment and patient choice. Long-term antibiotic use is variable and specialists are uncertain about optimal dosing and which patients might benefit. Surgery is regarded as an important treatment option for patients with severe symptoms and especially in those with nasal polyps, although timing of surgery remains unclear, and the

1  
2  
3 uncertainty about net longer term benefits of surgery makes balancing of benefits and risks  
4 more difficult.  
5

## 6 **Comparison with current literature**

### 7 **GP Management:**

8  
9  
10  
11 The findings of this study suggests that there is wide variation in the diagnosis and  
12 management of CRS in primary care in the UK, which is likely to be due to limited ENT  
13 training and insufficient national guidance. It has been long recognised that GPs receive  
14 limited ENT training at both undergraduate and postgraduate level<sup>16</sup> and this is particularly  
15 important in light of the number of ENT conditions that are initially seen in general practice.  
16 Our findings agree with previous research that GPs would like further ENT training<sup>17</sup>, and  
17 that regional courses and updates might be useful to improve knowledge, clinical skills and  
18 referral pathways to secondary care.  
19  
20  
21  
22

23 Intranasal corticosteroids (INCS) are commonly prescribed for CRS, however our research  
24 identified local prescribing restrictions and that both adherence and adequacy of correct  
25 nasal spray use by patients was perceived to be extremely variable. These findings support  
26 the results of a case-control study in the UK which found that current INCS usage is less than  
27 15% in CRS patients, and only 1% of patients regularly use saline nasal irrigation<sup>18</sup>. Such  
28 usage may result in poor symptom control and untimely referral. Reasons for low usage are  
29 likely to be multifactorial. Previous qualitative work has identified that patients can be  
30 dissatisfied with topical treatments due to their perceived ineffectiveness<sup>19</sup> and concern  
31 about potential side effects<sup>20</sup>. Similarly, nasal irrigation was not widely advocated by GPs in  
32 this study due to uncertainties about effectiveness and a perceived burden for patients.  
33 However, there is now evidence from a recent trial which found nasal irrigation to be  
34 acceptable to patients with recurrent or chronic rhinosinusitis and provides symptomatic  
35 benefit in the primary care setting<sup>21, 22</sup>. Currently in the UK, nasal irrigation kits cannot be  
36 prescribed by GPs as they are considered medical devices rather than medicines, so have to  
37 be purchased by patients and costs may deter uptake.  
38  
39  
40  
41  
42  
43

44 Some GPs described uncertainty about the optimal timing of referral, with wide variation in  
45 practice and a lack of clarity about referral criteria for both CRSsNP and CRSwNP.  
46 Correspondingly, ENT specialists reported variation in timing and precision of referral,  
47 expressing concerns that some patients experience unnecessarily delays, whilst others were  
48 referred too early and without trials of basic medical treatment. The EPOS guidelines<sup>3</sup>  
49 recommend referral in patients where no improvement has been achieved after 4 weeks of  
50 treatment with INCS and nasal irrigation. However, knowledge and uptake of the European  
51 guideline is understandably variable in UK primary care. An audit of CCGs in England found  
52 that compliance with CRS commissioning was limited in 13% of CCGs<sup>23</sup>. It may be that such  
53  
54  
55  
56

1  
2  
3 guidance is not perceived in the same way that NICE guidance is viewed, affecting  
4 management and referral decisions, and fostering the variation of practice reported in this  
5 study. Similarly, in Dutch general practice, management of patients with CRS has been  
6 reported inconsistent and not always in accordance with local guidelines<sup>24</sup>.  
7  
8  
9  
10

### 11 **ENT management**

12  
13  
14 Our study highlighted wide variation in diagnostic criteria and management decisions for  
15 CRS even amongst ENT specialists. Practice variation in usage of long-term antibiotics and  
16 timing of sinus surgery suggest that there is a lack of clarity around the evidence base for  
17 treatment of both CRSsNP and CRSwNP. There remains a paucity of evidence for sinus  
18 surgery, and more research is required to understand best timing, although emerging  
19 evidence shows that surgery undertaken closer to the time of diagnosis may improve  
20 longer-term outcomes both in terms of symptoms and late onset asthma<sup>25, 26</sup>. There is also a  
21 perception amongst GPs and ENT specialists in this study that surgery was not of any long-  
22 term benefit and that patients will simply keep returning; this is of course borne out by the  
23 high revision rate seen in two UK national studies<sup>27, 28</sup>. A key part of this issue is the post-  
24 operative care and compliance with topical treatment. The forthcoming trial in the MACRO  
25 programme<sup>14</sup> will address the role of sinus surgery in an RCT context which has not been  
26 done to date, despite many case series showing favourable outcomes, including the UK  
27 Sinonasal audit<sup>29</sup>. There will also be a longer-term plan to follow up the patients beyond the  
28 trial so that the benefits of sinus surgery beyond the short-term can be addressed.  
29  
30  
31  
32  
33  
34  
35  
36

### 37 **Implications for practice**

38  
39  
40 In view of the currently fragmented and diverse situation, there is a need to clarify care  
41 pathways for CRSwNP and CRSsNP across primary and secondary care. Development of an  
42 evidence-based integrated care pathway, informed by patient, generalist and specialist  
43 perspectives, may help to improve management of patients with CRS. Communication  
44 between ENT and general practice needs enhancing, and clarification of diagnostic,  
45 treatment, and referral algorithms has the potential to improvement early management and  
46 precision of referral. Improving the information to both patients and clinicians as to the  
47 appropriate use of both medical and surgical interventions to best effect, including  
48 addressing rationale for treatment options, safety, technique, compliance and dispelling  
49 misperceptions around the various treatment options, has the potential to improve  
50 outcomes and reduce variation and costs.  
51  
52  
53  
54  
55  
56  
57  
58  
59  
60

## **Strengths and limitations**

A key strength of this study was the inclusion of both generalist and specialist views from representative samples of front-line clinicians, to provide a better understanding of the CRS patient pathway from multiple perspectives which have not been captured in previous studies. However, it is possible that our sample of clinicians were particularly interested in CRS or research of this nature and thus their views may not have represented those of the non-respondents.

A good level of thematic data saturation was achieved with our sample of participants, but we acknowledge that the views of other stakeholders such as nurse practitioners in primary care and staff grade ENT specialists may have provided an additional viewpoint.

Additionally the views and experiences of patients with CRS are important in understanding the patient journey and these are presented elsewhere.

This study used rigorous methods to ensure credibility and trustworthiness of the findings, including multiple coders, constant comparison techniques, and maintained a transparent audit trail.

## **Conclusion**

In summary this qualitative study found that clinicians are uncertain about best management of patients with CRS in both primary and secondary care, and there is wide variation in practice. Improved communication between ENT and general practice together with an evidence-based integrated care pathway for CRSsNP and CRSwNP is needed to improve CRS patient management and timely referral.

## **Author statement**

The protocol was developed by CE, MT, CP, CH, AS, PL and HB. JV led the data collection and analysis, with academic contributions from CE, MT, CP and CH. JV drafted the manuscript and coordinated the revisions from all authors. All authors read and approved the final manuscripts.

A patient contributor (JB) from the MACRO programme management group also provided input into the design of the study, and reviewed and commented on drafts of this manuscript.

## Funding

This study was funded as part of the MACRO Programme Grant for Applied Research (NIHR PGfAR) RP-PG-0614-20011

## Ethical approval

This study was given ethical approval on 22 September 2017 by the Office for Research Ethics Committees Northern Ireland (ORECNI). REC reference: 16/NI/0197

## Competing interests

None declared

## Acknowledgements

The authors would like to thank the healthcare professionals who contributed and made this study possible.

## Data sharing statement

There is no additional data available for sharing.

## References

1. Gliklich RE and Metson R. The health impact of chronic sinusitis in patients seeking otolaryngologic care. *Otolaryngology--head and neck surgery : official journal of American Academy of Otolaryngology-Head and Neck Surgery* 1995; 113: 104-109. 1995/07/01. DOI: 10.1016/s0194-59989570152-4.
2. Wensing M, Vingerhoets E and Grol R. Functional status, health problems, age and comorbidity in primary care patients. *Quality of life research : an international journal of quality of life aspects of treatment, care and rehabilitation* 2001; 10: 141-148. 2001/10/20.
3. Fokkens WJ, Lund VJ, Mullol J, et al. EPOS 2012: European position paper on rhinosinusitis and nasal polyps 2012. A summary for otorhinolaryngologists. *Rhinology* 2012; 50: 1-12. 2012/04/04. DOI: 10.4193/Rhino50E2.



- 1  
2  
3 4. Hastan D, Fokkens WJ, Bachert C, et al. Chronic rhinosinusitis in Europe--an  
4 underestimated disease. A GA(2)LEN study. *Allergy* 2011; 66: 1216-1223. DOI:  
5 10.1111/j.1398-9995.2011.02646.x.  
6
- 7 5. Hopkins C, Holy C and Philpott C. Care pathway of patients with chronic  
8 rhinosinusitis in the UK. 2015. In British Academic Conference in Otorhinolaryngology,  
9 Liverpool.  
10
- 11 6. Hospital Episode statistics, Department of Health. 2013.  
12
- 13 7. Desrosiers M, Evans GA, Keith PK, et al. Canadian clinical practice guidelines for  
14 acute and chronic rhinosinusitis. *Allergy, asthma, and clinical immunology : official journal*  
15 *of the Canadian Society of Allergy and Clinical Immunology* 2011; 7: 2. 2011/02/12. DOI:  
16 10.1186/1710-1492-7-2.  
17
- 18 8. Royal College of Surgeons 2013. Commissioning Guide: available at:  
19 [https://www.rcseng.ac.uk/standards-and-research/commissioning/commissioning-](https://www.rcseng.ac.uk/standards-and-research/commissioning/commissioning-guides/topics/)  
20 [guides/topics/](https://www.rcseng.ac.uk/standards-and-research/commissioning/commissioning-guides/topics/).  
21  
22
- 23 9. Chong LY, Head K, Hopkins C, et al. Different types of intranasal steroids for chronic  
24 rhinosinusitis. *Cochrane Database Syst Rev* 2016; 4: Cd011993. 2016/04/27. DOI:  
25 10.1002/14651858.CD011993.pub2.  
26
- 27 10. Chong LY, Head K, Hopkins C, et al. Intranasal steroids versus placebo or no  
28 intervention for chronic rhinosinusitis. *Cochrane Database Syst Rev* 2016; 4: Cd011996.  
29 2016/04/27. DOI: 10.1002/14651858.CD011996.pub2.  
30
- 31 11. Chong LY, Head K, Hopkins C, et al. Saline irrigation for chronic rhinosinusitis.  
32 *Cochrane Database Syst Rev* 2016; 4: Cd011995. 2016/04/27. DOI:  
33 10.1002/14651858.CD011995.pub2.  
34
- 35 12. Gulliford MC, Dregan A, Moore MV, et al. Continued high rates of antibiotic  
36 prescribing to adults with respiratory tract infection: survey of 568 UK general practices.  
37 *BMJ Open* 2014; 4: e006245. 2014/10/29. DOI: 10.1136/bmjopen-2014-006245.  
38
- 39 13. Lasso A, Masoudian P, Quinn JG, et al. Long-term low-dose macrolides for chronic  
40 rhinosinusitis in adults - a systematic review of the literature. *Clinical otolaryngology :*  
41 *official journal of ENT-UK ; official journal of Netherlands Society for Oto-Rhino-Laryngology*  
42 *& Cervico-Facial Surgery* 2017; 42: 637-650. 2016/11/04. DOI: 10.1111/coa.12787.  
43  
44
- 45 14. The MACRO programme, <https://www.themacroprogramme.org.uk/> (accessed  
46 January 2018).  
47
- 48 15. Braun V and Clarke V. Using thematic analysis in psychology. *Qualitative Research in*  
49 *Psychology*, 3, 77-101. 2006.  
50
- 51 16. Clamp PJ, Gunasekaran S, Pothier DD, et al. ENT in general practice: training,  
52 experience and referral rates. *The Journal of Laryngology & Otolology* 2006; 121: 580-  
53 583. 10/19. DOI: 10.1017/S0022215106003495.  
54  
55  
56

- 1  
2  
3 17. Easto RH and Reddy V. A survey of ENT experience in South West Peninsula general  
4 practitioner trainees: how can post-graduate ENT training be improved? *The Journal of*  
5 *Laryngology & Otolaryngology* 2016; 130: 893-896. 09/08. DOI:  
6 10.1017/S0022215116008665.  
7
- 8 18. Philpott C, Erskine S, Smith R, et al. Current Use of Baseline Medical Treatment in  
9 Chronic Rhinosinusitis: Data from the National Chronic Rhinosinusitis Epidemiology Study  
10 (CRES). *Clinical otolaryngology : official journal of ENT-UK ; official journal of Netherlands*  
11 *Society for Oto-Rhino-Laryngology & Cervico-Facial Surgery* 2017 2017/10/22. DOI:  
12 10.1111/coa.13012.  
13
- 14 19. Erskine SE, Verkerk MM, Notley C, et al. Chronic rhinosinusitis: patient experiences  
15 of primary and secondary care - a qualitative study. *Clinical otolaryngology : official journal*  
16 *of ENT-UK ; official journal of Netherlands Society for Oto-Rhino-Laryngology & Cervico-*  
17 *Facial Surgery* 2016; 41: 8-14. 2015/05/15. DOI: 10.1111/coa.12462.  
18  
19
- 20 20. Hellings PW, Dobbels F, Denhaerynck K, et al. Explorative study on patient's  
21 perceived knowledge level, expectations, preferences and fear of side effects for treatment  
22 for allergic rhinitis. *Clinical and translational allergy* 2012; 2: 9. 2012/05/31. DOI:  
23 10.1186/2045-7022-2-9.  
24  
25
- 26 21. Little P, Stuart B, Mullee M, et al. Effectiveness of steam inhalation and nasal  
27 irrigation for chronic or recurrent sinus symptoms in primary care: a pragmatic randomized  
28 controlled trial. *CMAJ : Canadian Medical Association journal = journal de l'Association*  
29 *medicale canadienne* 2016; 188: 940-949. 2016/07/20. DOI: 10.1503/cmaj.160362.  
30  
31
- 32 22. Little P, Leydon G, Thomas T, et al. 'Well, it literally stops me from having a life when  
33 it's really bad': a nested qualitative interview study of patient views on the use of self-  
34 management treatments for the management of recurrent sinusitis (SNIFS trial). *BMJ Open*  
35 2017.  
36
- 37 23. Soni-Jaiswal A, Philpott C and Hopkins C. The impact of commissioning for  
38 rhinosinusitis in England. *Clin Otolaryngol* 2015; 40: 639-645. DOI: 10.1111/coa.12430.  
39  
40
- 41 24. Hoffmans R, Schermer T, van Weel C, et al. Management of rhinosinusitis in Dutch  
42 general practice. *Primary Care Respiratory Journal* 2011; 20: 64. Original Research. DOI:  
43 10.4104/pcrj.2010.00064.  
44
- 45 25. Hopkins C, Rimmer J and Lund VJ. Does time to endoscopic sinus surgery impact  
46 outcomes in Chronic Rhinosinusitis? Prospective findings from the National Comparative  
47 Audit of Surgery for Nasal Polyposis and Chronic Rhinosinusitis. *Rhinology* 2015; 53: 10-17.  
48 DOI: 10.4193/Rhin13-217.  
49
- 50 26. Benninger MS, Sindwani R, Holy CE, et al. Impact of medically recalcitrant chronic  
51 rhinosinusitis on incidence of asthma. *International forum of allergy & rhinology* 2016; 6:  
52 124-129. 2015/12/02. DOI: 10.1002/alr.21652.  
53  
54  
55  
56

- 1  
2  
3 27. Hopkins C, Slack R, Lund V, et al. Long-term outcomes from the English national  
4 comparative audit of surgery for nasal polyposis and chronic rhinosinusitis. *Laryngoscope*  
5 2009; 119: 2459-2465. DOI: 10.1002/lary.20653.  
6  
7 28. Philpott C, Hopkins C, Erskine S, et al. The burden of revision sinonasal surgery in the  
8 UK-data from the Chronic Rhinosinusitis Epidemiology Study (CRES): a cross-sectional study.  
9 *BMJ Open* 2015; 5: e006680. DOI: 10.1136/bmjopen-2014-006680.  
10  
11 29. Hopkins C, Browne JP, Slack R, et al. The national comparative audit of surgery for  
12 nasal polyposis and chronic rhinosinusitis. *Clinical Otolaryngology* 2006; 31: 390-398. DOI:  
13 10.1111/j.1749-4486.2006.01275.x.  
14  
15  
16  
17  
18  
19  
20  
21  
22  
23  
24  
25  
26  
27  
28  
29  
30  
31  
32  
33  
34  
35  
36  
37  
38  
39  
40  
41  
42  
43  
44  
45  
46  
47  
48  
49  
50  
51  
52  
53  
54  
55  
56  
57  
58  
59  
60

## Appendix 1

### GP/ENT SPECIALIST INTERVIEW GUIDE

#### Section 1: Experiences with and diagnosing patients with chronic Rhinosinusitis (CRS)

- To start us off, I just want to ask you some specific questions about your experience of seeing patients who have chronic rhinosinusitis.
  - *Prompt:* understanding of the term chronic rhinosinusitis (CRS).
  - *Prompt:* how many patients.
  - *Prompt:* for any challenges
- Please talk me through the approach that you use to help decide whether a patient has CRS?
  - *Prompt:* for any challenges
  - *Prompt:* for views on any diagnostic criteria if aware of them.
  - *Prompt:* for familiarity with the different sub-categories of CRS (CRS with polyps, CRS without polyps).
  - *Prompt:* for any investigations or diagnostic tests.

#### Section 2: Experiences and views on treatment options for patients with CRS

##### GP views:

- Please talk me through your experience of treating patients with CRS
  - *Prompt:* for any challenges
  - *Prompt:* for any treatments you may initiate for patients with CRS
- What is your view of these treatments for managing CRS
  - *Prompt:* for antibiotics (standard short term antibiotics – such as 1-2 week courses, versus long term courses) nasal steroid sprays/drops/oral steroids and nasal douching/saline irrigations.
  - *Prompt:* for patient pressure for antibiotics
  - *Prompt:* for how they assess response to treatment
- How would you decide whether to, and when to refer/not refer your patient to a specialist?
- What is your view of the role of surgery in CRS?
- What is your preferred method of keeping up to date with the current evidence base for CRS

- *Prompt:* for how they keep up with evidence (journals, conferences, peer meetings).
- *Prompt:* for view of evidence base

### ENT specialist views:

- Please talk me through your experience of treating patients with CRS
  - *Prompt:* for any challenges
  - *Prompt:* for any treatments you may initiate for patients with CRS
- What is your view of these treatments for managing CRS
  - *Prompt:* for antibiotics (standard short term antibiotics – such as 1-2 week courses, versus long term courses) nasal steroid sprays/drops/oral steroids and nasal douching/saline irrigations.
  - *Prompt:* for how they assess response to treatment
- What is your view of the role of surgery for managing CRS
  - *Prompt:* for how they decide who to list for surgery
  - *Prompt:* for how they assess response to treatment
  - *Prompt:* How long they follow up CRS patients in clinic
- What is your preferred method of keeping up to date with the current evidence base for CRS
  - *Prompt:* for how they keep up with evidence (journals, conferences, peer meetings).
  - *Prompt:* for view of evidence base
- What is your view of the referrals that you get from GPs
  - *Prompt:* for the timing and quality of GP referrals received
  - *Prompt:* for too many or too few CRS referrals?

### Section 3: Views on use and knowledge of guidelines

- What are your views of aids to diagnosis and the treatment and management of CRS, such as diagnostic criteria and guidelines?
  - *Prompt:* for guidelines (local or national)
  - *Prompt:* for familiarity and usefulness of the commissioning guidelines from the Royal College of Surgeons of England/ENT UK?
  - *Prompt:* knowledge of any other local guidelines that their CCG may adhere to
  - *Prompt:* for any other local guidance, such as peer support
  - *Prompt:* for guidance sought from research evidence

## COREQ (COnsolidated criteria for REporting Qualitative research) Checklist

A checklist of items that should be included in reports of qualitative research. You must report the page number in your manuscript where you consider each of the items listed in this checklist. If you have not included this information, either revise your manuscript accordingly before submitting or note N/A.

| Topic                                          | Item No. | Guide Questions/Description                                                                                                                              | Reported on Page No. |
|------------------------------------------------|----------|----------------------------------------------------------------------------------------------------------------------------------------------------------|----------------------|
| <b>Domain 1: Research team and reflexivity</b> |          |                                                                                                                                                          |                      |
| <i>Personal characteristics</i>                |          |                                                                                                                                                          |                      |
| Interviewer/facilitator                        | 1        | Which author/s conducted the interview or focus group?                                                                                                   |                      |
| Credentials                                    | 2        | What were the researcher's credentials? E.g. PhD, MD                                                                                                     |                      |
| Occupation                                     | 3        | What was their occupation at the time of the study?                                                                                                      |                      |
| Gender                                         | 4        | Was the researcher male or female?                                                                                                                       |                      |
| Experience and training                        | 5        | What experience or training did the researcher have?                                                                                                     |                      |
| <i>Relationship with participants</i>          |          |                                                                                                                                                          |                      |
| Relationship established                       | 6        | Was a relationship established prior to study commencement?                                                                                              |                      |
| Participant knowledge of the interviewer       | 7        | What did the participants know about the researcher? e.g. personal goals, reasons for doing the research                                                 |                      |
| Interviewer characteristics                    | 8        | What characteristics were reported about the interviewer/facilitator? e.g. Bias, assumptions, reasons and interests in the research topic                |                      |
| <b>Domain 2: Study design</b>                  |          |                                                                                                                                                          |                      |
| <i>Theoretical framework</i>                   |          |                                                                                                                                                          |                      |
| Methodological orientation and Theory          | 9        | What methodological orientation was stated to underpin the study? e.g. grounded theory, discourse analysis, ethnography, phenomenology, content analysis |                      |
| <i>Participant selection</i>                   |          |                                                                                                                                                          |                      |
| Sampling                                       | 10       | How were participants selected? e.g. purposive, convenience, consecutive, snowball                                                                       |                      |
| Method of approach                             | 11       | How were participants approached? e.g. face-to-face, telephone, mail, email                                                                              |                      |
| Sample size                                    | 12       | How many participants were in the study?                                                                                                                 |                      |
| Non-participation                              | 13       | How many people refused to participate or dropped out? Reasons?                                                                                          |                      |
| <i>Setting</i>                                 |          |                                                                                                                                                          |                      |
| Setting of data collection                     | 14       | Where was the data collected? e.g. home, clinic, workplace                                                                                               |                      |
| Presence of non-participants                   | 15       | Was anyone else present besides the participants and researchers?                                                                                        |                      |
| Description of sample                          | 16       | What are the important characteristics of the sample? e.g. demographic data, date                                                                        |                      |
| <i>Data collection</i>                         |          |                                                                                                                                                          |                      |
| Interview guide                                | 17       | Were questions, prompts, guides provided by the authors? Was it pilot tested?                                                                            |                      |
| Repeat interviews                              | 18       | Were repeat interviews carried out? If yes, how many?                                                                                                    |                      |
| Audio/visual recording                         | 19       | Did the research use audio or visual recording to collect the data?                                                                                      |                      |
| Field notes                                    | 20       | Were field notes made during and/or after the interview or focus group?                                                                                  |                      |
| Duration                                       | 21       | What was the duration of the interviews or focus group?                                                                                                  |                      |
| Data saturation                                | 22       | Was data saturation discussed?                                                                                                                           |                      |
| Transcripts returned                           | 23       | Were transcripts returned to participants for comment and/or                                                                                             |                      |

| Topic                                  | Item No. | Guide Questions/Description                                                                                                        | Reported on Page No. |
|----------------------------------------|----------|------------------------------------------------------------------------------------------------------------------------------------|----------------------|
|                                        |          | correction?                                                                                                                        |                      |
| <b>Domain 3: analysis and findings</b> |          |                                                                                                                                    |                      |
| <i>Data analysis</i>                   |          |                                                                                                                                    |                      |
| Number of data coders                  | 24       | How many data coders coded the data?                                                                                               |                      |
| Description of the coding tree         | 25       | Did authors provide a description of the coding tree?                                                                              |                      |
| Derivation of themes                   | 26       | Were themes identified in advance or derived from the data?                                                                        |                      |
| Software                               | 27       | What software, if applicable, was used to manage the data?                                                                         |                      |
| Participant checking                   | 28       | Did participants provide feedback on the findings?                                                                                 |                      |
| <i>Reporting</i>                       |          |                                                                                                                                    |                      |
| Quotations presented                   | 29       | Were participant quotations presented to illustrate the themes/findings?<br>Was each quotation identified? e.g. participant number |                      |
| Data and findings consistent           | 30       | Was there consistency between the data presented and the findings?                                                                 |                      |
| Clarity of major themes                | 31       | Were major themes clearly presented in the findings?                                                                               |                      |
| Clarity of minor themes                | 32       | Is there a description of diverse cases or discussion of minor themes?                                                             |                      |

Developed from: Tong A, Sainsbury P, Craig J. Consolidated criteria for reporting qualitative research (COREQ): a 32-item checklist for interviews and focus groups. *International Journal for Quality in Health Care*. 2007. Volume 19, Number 6: pp. 349 – 357

**Once you have completed this checklist, please save a copy and upload it as part of your submission. DO NOT include this checklist as part of the main manuscript document. It must be uploaded as a separate file.**

# BMJ Open

## Management strategies for chronic rhinosinusitis: A qualitative study of GP and ENT specialist views of current practice in the UK.

|                                 |                                                                                                                                                                                                                                                                                                                                                                                                                                                                                                                                                                                                                                                                                                        |
|---------------------------------|--------------------------------------------------------------------------------------------------------------------------------------------------------------------------------------------------------------------------------------------------------------------------------------------------------------------------------------------------------------------------------------------------------------------------------------------------------------------------------------------------------------------------------------------------------------------------------------------------------------------------------------------------------------------------------------------------------|
| Journal:                        | <i>BMJ Open</i>                                                                                                                                                                                                                                                                                                                                                                                                                                                                                                                                                                                                                                                                                        |
| Manuscript ID                   | bmjopen-2018-022643.R2                                                                                                                                                                                                                                                                                                                                                                                                                                                                                                                                                                                                                                                                                 |
| Article Type:                   | Research                                                                                                                                                                                                                                                                                                                                                                                                                                                                                                                                                                                                                                                                                               |
| Date Submitted by the Author:   | 24-Oct-2018                                                                                                                                                                                                                                                                                                                                                                                                                                                                                                                                                                                                                                                                                            |
| Complete List of Authors:       | Vennik, Jane; University of Southampton , Primary Care and Population Sciences<br>Eyles, Caroline; University of Southampton, Primary Care and Population Sciences<br>Thomas, Mike; University of Southampton, Primary Care and Population Sciences<br>Hopkins, claire; Guys Hospital, ENT<br>Little, Paul; University of Southampton, Primary Care and Population Science<br>Blackshaw, Helen; UCL Ear Institute, evidENT<br>Schilder, Anne; University College London Ear Institute<br>Boardman, Jim; Fifth Sense: the charity of people with smell and taste disorders<br>Philpott, Carl; University of East Anglia,, Norwich Medical School; James Paget University Hospitals NHS Foundation Trust |
| <b>Primary Subject Heading</b>: | Ear, nose and throat/otolaryngology                                                                                                                                                                                                                                                                                                                                                                                                                                                                                                                                                                                                                                                                    |
| Secondary Subject Heading:      | General practice / Family practice, Qualitative research                                                                                                                                                                                                                                                                                                                                                                                                                                                                                                                                                                                                                                               |
| Keywords:                       | QUALITATIVE RESEARCH, Sinusitis, GP views, Endoscopic sinus surgery, ENT specialist views, Patient care management                                                                                                                                                                                                                                                                                                                                                                                                                                                                                                                                                                                     |
|                                 |                                                                                                                                                                                                                                                                                                                                                                                                                                                                                                                                                                                                                                                                                                        |

SCHOLARONE™  
Manuscripts



## Title

Management strategies for chronic rhinosinusitis: A qualitative study of GP and ENT specialist views of current practice in the UK.

---

## Authorship

Jane Vennik<sup>1</sup>, Caroline Eyles<sup>1</sup>, Mike Thomas<sup>1</sup>, Claire Hopkins<sup>2</sup>, Paul Little<sup>1</sup>, Helen Blackshaw<sup>3</sup>, Anne Schilder<sup>3</sup>, Jim Boardman<sup>4</sup>, Carl Philpott<sup>5,6</sup>.

<sup>1</sup> Primary Care and Populations Sciences, Faculty of Medicine, University of Southampton, Aldermoor Close, Southampton. SO16 5ST

<sup>2</sup> Guy's and St. Thomas' NHS Foundation Trust

<sup>3</sup> evidENT, University College London

<sup>4</sup> Fifth Sense: a charity for people with smell and taste disorders

<sup>5</sup> Norwich Medical School, University of East Anglia, Norwich. NR4 7TJ

<sup>6</sup> James Paget University Hospital NHS Foundation Trust, Gorleston, NR31 6LA

## Corresponding Author

Dr J Vennik

[j.vennik@soton.ac.uk](mailto:j.vennik@soton.ac.uk)

Word count: 3378 without quotes, (4585 with quotes)

## Abstract

### Objectives:

To explore GP and ENT specialist perspectives of current treatment strategies for chronic rhinosinusitis (CRS) and care pathways through primary and secondary care.

### Design:

Semi-structured qualitative telephone interviews as part of the MACRO programme.

### Setting

Primary care and secondary care ENT outpatient clinics in the UK

### Participants

Twelve GPs and 9 ENT specialists consented to in-depth telephone interviews. Transcribed recordings were managed using NVivo software and analysed using inductive thematic analysis

### Main outcome measures

Healthcare professional views of management options and care pathways for CRS.

### Results

GPs describe themselves as confident in recognising CRS, with the exception of assessing nasal polyps. In contrast, specialists report common missed diagnoses (e.g. allergy; chronic headache) when patients are referred to ENT clinics, and attribute this to the limited ENT training of GPs. Steroid nasal sprays provide the foundation of treatment in primary care, although local prescribing restrictions can affect treatment choice and poor adherence is perceived to be the causes of inadequate symptom control. Symptom severity, poor response to medical treatment, and patient pressure drive referral, although there is uncertainty about optimal timing. Treatment decisions in secondary care are based on disease severity, polyp status, prior medical treatment and patient choice, but there is major uncertainty about the place of longer courses of antibiotics and the use of oral steroids. Surgery is regarded as an important treatment option for patients with severe symptoms or with nasal polyps, although timing of surgery remains unclear, and the uncertainty about net longer term benefits of surgery makes balancing of benefits and risks more difficult.

## Conclusions

Clinicians are uncertain about best management of patients with CRS in both primary and secondary care and practice is varied. An integrated care pathway for CRS is needed to improve patient management and timely referral.

## Strengths and limitations

- The interviews permitted exploration of diagnosis, treatment and management strategies for patients with CRS through primary and secondary care.
- Participants were sampled from different geographical areas of England and Scotland, enhancing transferability of the study findings.
- The inclusion of generalist and specialist views provided a better understanding of CRS management from multiple perspectives.
- Including other clinicians such as ENT speciality doctors and primary care nurse practitioners may have provided an additional viewpoint.
- Patient views and experiences are not included but are presented elsewhere.

## Introduction

Chronic rhinosinusitis (CRS) is a prevalent chronic inflammatory condition of the nose and paranasal sinuses which significantly affects the health and quality of life of patients<sup>1, 2</sup>, and contributes a significant burden to NHS healthcare resources. CRS is defined in the European Position Paper on Rhinosinusitis (EPOS 2012)<sup>3</sup> by the presence of at least two symptoms, one of which must be either nasal congestion or nasal discharge together with facial pain/pressure and/or anosmia lasting for more than 12 weeks. This is then further qualified by the presence (CRSwNP) or absence of nasal polyps (CRSSNP). Based on the symptom and duration definition alone, prevalence rates are estimated at 10% in the UK<sup>4</sup>. Longitudinal data from the Clinical Practice Research Datalink (CPRD) suggests that 1% of British adults receive treatment each year in primary care, resulting in multiple GP consultations and medical prescriptions<sup>5</sup>. There is significant onward referral to specialist ENT services leading to 120,000 outpatient appointments and 40,000 sinus operations annually in England and Wales<sup>6</sup>.

To date there are no NICE guidelines for managing patients with CRS. International<sup>7</sup> and European (EPOS) guidelines<sup>3</sup> are present, however, awareness and uptake in UK practice is unclear. Commissioning guidelines<sup>8</sup> for management of rhinosinusitis were developed in collaboration with the Royal College Of Surgeons England and NICE, but local compliance with

1  
2  
3 guidelines is variable and access to specialist care is restricted in some areas. Intranasal  
4 corticosteroids (INCS) and nasal irrigation are strongly recommended based on high-quality  
5 evidence<sup>9-11</sup>, however there are uncertainties about uptake and compliance in primary care.  
6 Most GP consultations for acute or chronic rhinosinusitis result in an antibiotic prescription  
7 despite insufficient evidence for routine use<sup>12</sup>. Uncertainties in secondary care result in a 5-fold  
8 variation in surgical rates around the UK<sup>6</sup> and there is conflicting evidence for the use of long-  
9 term antibiotics<sup>13</sup>.

10  
11  
12  
13  
14 The views and experiences of healthcare professionals involved in the CRS patient pathway have  
15 yet to be investigated in depth. As yet, no studies have explored GP practice variation in terms  
16 of knowledge of the guidelines, treatment decisions and referral criteria, and there is limited  
17 understanding of ENT specialist views and experiences of treating patients with CRS.

18  
19  
20  
21 MACRO (Defining best Management for Adults with Chronic Rhinosinusitis)<sup>14</sup> is an NIHR funded  
22 programme of research designed to establish best practice for CRS management in adults across  
23 primary and secondary care. This paper reports a qualitative interview study, conducted as part  
24 of the MACRO programme, exploring GP and ENT specialist views of current treatment strategies  
25 and care pathways for CRS patients through primary and secondary care.

## 26 27 28 29 **Methods**

### 30 31 Design

32  
33  
34  
35 A qualitative interview study was conducted with a purposeful sample of GPs and ENT  
36 specialists between January and April 2017. The study was given ethical approval by the Health  
37 and Social Care Research Ethics Committee A (HSC REC A) on 22 September 2017 (16/NI/0197).

### 38 39 40 41 Participants and procedures

42  
43  
44  
45 GPs were approached through the NIHR Clinical Research Network (CRN) in regions of Wessex,  
46 Eastern and South East England. Fifteen interested GPs with experience of treating patients with  
47 CRS responded to the study team and were purposefully sampled for a range of characteristics  
48 including gender, GP experience, practice location and practice population demographics.

49  
50  
51  
52 ENT specialists with experience of treating patients with CRS were recruited through an email to  
53 the membership of ENT-UK (the professional body representing ENT surgeons). Thirty-one ENT  
54 specialists from England and Scotland expressed an interest in participating and were

1  
2  
3 purposefully sampled for a range of demographics (location, time in practice) and ENT sub-  
4 speciality interest (including generalists and rhinologists).  
5  
6  
7

## 8 Interviews

9

10  
11 A trained interviewer (JV) conducted semi-structured telephone interviews with participants  
12 each lasting approximately 25-55 minutes. JV (female) is a postdoctoral research fellow for the  
13 MACRO programme, trained in qualitative research methods and with previous experience of  
14 ENT and primary care research, who was not previously known to the interview participants.  
15 Telephone interviews were employed to allow inclusion of participants from a wide geographical  
16 area. Each participant gave verbal consent prior to commencing the interview. An interview  
17 guide (Appendix 1) was developed through collaboration and input from the wider MACRO  
18 research team, and subsequently piloted with an ENT specialist and minor modifications made  
19 to reflect any issues that arose. The guide was used to direct but not constrain the interviews and  
20 was sufficiently flexible to allow exploration of unexpected topics and themes. Field notes were  
21 used to facilitate interpretation and contextualisation of the interviews.  
22  
23  
24  
25  
26  
27

28 GPs and ENT specialists were asked open-ended questions about their views of the diagnosis and  
29 management of CRS, knowledge and implementation of CRS guidelines, perceptions of the  
30 evidence base and experiences of practical decision-making in the management of patients with  
31 CRS. The interviews were audio-recorded and transcribed verbatim in preparation for analysis.  
32 Our epistemological position is one of subtle realism, and a pragmatic approach was adopted in  
33 this study.  
34  
35  
36  
37

## 38 Analysis

39

40  
41  
42 Inductive thematic analysis<sup>15</sup> was used to analyse the interview transcripts, using NVIVO 11 to  
43 facilitate data management. Each participant group (GPs and ENT surgeons) were analysed  
44 independently. Each analysis commenced with familiarisation and immersion in the data itself,  
45 leading to identification of initial patterns and themes within the data set. Descriptive codes  
46 were then used to label sections of the data. A number of transcripts were coded by more than  
47 one researcher (JV and CE) which brings multiple perspectives to the analysis and provides an  
48 opportunity to discuss coding decisions at an early stage. Codes were then developed and refined  
49 as analysis progressed, and where uncertainties arose, team discussions facilitated agreement  
50 and adjustment. These codes were then linked together, grouped, refined and re-labelled  
51 resulting in a set of themes and sub-themes for each participant group. Following an iterative  
52  
53  
54  
55  
56  
57  
58  
59  
60

1  
2  
3 process of comparing and contrasting the two datasets, a set of overarching themes and sub-  
4 themes were developed which systematically and thoroughly explained the data. Data collection  
5 and analysis took place concurrently, and interviews continued until data saturation was  
6 achieved.  
7  
8  
9

## 10 **Patient involvement**

11  
12  
13  
14 A patient contributor (JB) from the MACRO programme management group provided input into  
15 the design of the study from the patient perspective, and contributed to the development of  
16 the interview topic guide.  
17  
18  
19  
20  
21  
22  
23  
24  
25  
26  
27  
28  
29  
30  
31  
32  
33  
34  
35  
36  
37  
38  
39  
40  
41  
42  
43  
44  
45  
46  
47  
48  
49  
50  
51  
52  
53  
54  
55  
56  
57  
58  
59  
60

## Results

### Participants

A total of 12 GPs participated in the study. 8 (76%) were male with median duration in general practice of 20 years (range 2-29). Included GPs were from rural and urban practices, from areas of differing social deprivation. Nine ENT specialists including general ENT surgeons and rhinologists also took part in a research interview; 8 were male with a median time on the specialist register of 19 years (range 8-21). Full details are presented in table 1.

Table 1: Participant characteristics

| <b>GP Characteristics</b>                                                                      | <b>N=12</b>         |
|------------------------------------------------------------------------------------------------|---------------------|
| Years in general practice (median, range)                                                      | 20 (2-29)           |
| Male                                                                                           | 8                   |
| Practice list size mean (range)                                                                | 9967 (4758 - 18571) |
| Practice deprivation decile<br>(where 1 is most deprived, 10 is least deprived) median (range) | 9 (3-10)            |
| Practice location                                                                              |                     |
| – Rural town and fringe                                                                        | 4                   |
| – Rural village and dispersed                                                                  | 1                   |
| – Urban city and town                                                                          | 4                   |
| – Urban major conurbation                                                                      | 3                   |
| <b>ENT specialist characteristics</b>                                                          | <b>N=9</b>          |
| Time (years) on specialist register (Otolaryngology) (median, range)                           | 19 (8-21)           |
| Male                                                                                           | 8                   |
| Sub-specialisation                                                                             |                     |
| – General ENT surgeon                                                                          | 3                   |
| – Special interest in rhinology                                                                | 4                   |
| – Consultant rhinologist                                                                       | 2                   |
| Location                                                                                       |                     |
| – Yorkshire and Humberside                                                                     | 1                   |
| – Midlands                                                                                     | 1                   |
| – London                                                                                       | 1                   |
|                                                                                                | 4                   |

- 
- South East
  - Scotland
- 

2

## Themes

Thematic analysis identified 4 main themes relating to the management of patients with CRS (Table 2). Quotations are presented to illustrate the themes and sub-themes, with details of the participants presented in parentheses.

Table 2: Themes and sub-themes

| <b>Theme</b>                   | <b>Sub-theme</b>                                                                                                                                                     |
|--------------------------------|----------------------------------------------------------------------------------------------------------------------------------------------------------------------|
| 1. Diagnostic uncertainties    | <ul style="list-style-type: none"> <li>• Reaching a diagnosis</li> <li>• Distinguishing between sub-groups</li> </ul>                                                |
| 2. Selecting best management   | <ul style="list-style-type: none"> <li>• Treatment decisions</li> <li>• Initiation treatment in primary care</li> <li>• Further medical treatment options</li> </ul> |
| 3. Decision-making for surgery | <ul style="list-style-type: none"> <li>• Implementing guidelines</li> <li>• Value of sinus surgery</li> <li>• Joint decision-making</li> </ul>                       |
| 4. Transition of care          | <ul style="list-style-type: none"> <li>• Factors affecting referral</li> <li>• Quality of referral</li> </ul>                                                        |

### **Theme 1: Diagnostic uncertainties**

#### Reaching a diagnosis

GPs describe themselves as confident in recognising CRS, making a diagnosis based on patient-reported history of symptoms and impact on quality of life, together with a basic physical examination of the nose. Duration of symptoms was described as an important diagnostic factor, although there is some uncertainty in primary care about the definition of chronicity.

---

*Then I guess really the diagnosis comes down to the time course more than anything. Assuming that that cluster of symptoms is present, it comes down to the time course. (GP 04)*

---



1  
2  
3 On the contrary, ENT specialists describe primary care diagnosis of CRS as of variable quality  
4 and precision, with many patients presenting at ENT clinics with a misdiagnosis.  
5  
6

---

7  
8 *So I think, therefore, their diagnostic ability for ENT conditions, broadly, and*  
9 *rhinosinusitis in particular, can be very poor (ENT 01)*  
10

---

11  
12  
13 Uncertainties can arise when symptoms overlap with other conditions, such as chronic  
14 headaches and allergic rhinitis, which can lead to patients receiving ineffective treatments.  
15

---

16  
17 *We see lots of patients who are referred with “recurrent sinus infections”*  
18 *where their main presenting symptom may be facial pain or headache, and*  
19 *most of those patients, in my experience, with those symptoms, don't have*  
20 *rhinosinusitis. (ENT 02)*  
21  
22

---

23  
24 ENT specialists also describe a diagnostic challenge where there is a dissociation between  
25 patient symptom history and clinical findings.  
26

---

27  
28  
29 *There's a well-defined group of patients who have symptoms which are on*  
30 *history virtually indistinguishable from CRS who actually have nothing on*  
31 *nasal endoscopy, in other words completely normal nasal endoscopy, and*  
32 *when the CT scan comes back that's completely normal as well (ENT 05)*  
33  
34

---

### 35 36 37 38 **Distinguishing between sub-groups** 39

40  
41 GPs report some difficulties in diagnosing patients with nasal polyps unless polyps are visible in  
42 the nasal cavity, due to the lack of diagnostic equipment in primary care.  
43

---

44  
45  
46 *Yes, with polyps, on the outset, if we have a patient with these symptoms, to*  
47 *sort of diagnose polyps is very difficult for us unless they've got a previous*  
48 *diagnosis (GP 08)*  
49

---

50  
51 In contrast, ENT specialists report the diagnosis of CRS without nasal polyps to be more  
52 challenging particularly when there is an absence of clinical findings on examination.  
53  
54

---

*The diagnosis of chronic rhinosinusitis without nasal polyps is really, really difficult. As I say, some of them will actually have pus dripping from their sinus into the nose, and that's very easy, but the majority of them don't have that at all. (ENT 08)*

---

## Theme 2: Selecting best management

### Treatment decisions

GPs report using local guidelines, journal articles, online learning modules and GP educational sessions to keep up to date with current practices. However, GP update courses are described as often too general and cover a broad range of topics. Events provided by the local ENT department were described as extremely useful but were infrequent.

---

*I tend to do a lot of online stuff, so I'll look at BMJ or RCGP learning. Sometimes, we get local events. We've not had a local ENT event recently, but we do get local consultants or specialist nurses, sometimes, come out and give us updates and guidelines. (GP 05)*

---

GPs also describe ENT clinic letters as useful and informative about current practice for managing patients with CRS.

---

*You get a flavour of reading letters and so you get an idea of what they recommend in their letters. (GP 09)*

---

Nonetheless, ENT specialists expressed opinion that GPs have limited ENT training and some are poorly trained to recognise and understand symptoms and pathology of CRS.

---

*Most GPs have never done any ENT jobs, ever, in their training. Most medical students don't get any ENT teaching, or very minimal ENT teaching, so you then have a sub-set of GPs who don't know any ENT unless it's what they've been told by their GP colleagues on the odd course they go to. (ENT 01)*

---

## Initiating treatment in primary care

Intranasal corticosteroids (INCS) were commonly described as first line treatment for patients with CRS, with the choice often associated with GP preference and experience. However, some GPs describe local prescribing restrictions where they are directed to prescribe lower cost nasal sprays such as beclomethasone, instead of more costly fluticasone, in the first instance.

---

*There will pop up a box [on our computers] saying, 'This costs this much, why don't you use this one which costs only this much?' So we're constantly reminded to use cost effective things. (GP 02)*

---

However, both GPs and ENT specialists suggested that patients did not always apply their nasal sprays correctly or did not comply with the treatment regimen over a longer period of time.

---

*It's quite obvious that they have been sniffing too much and it's gone all the way to the back of the throat, and they're using it incorrectly, maybe because no one informed them of how to use it in the past. (GP 06)*

---

GPs describe prescribing short courses of antibiotics for patients with acute infection, purulent discharge, febrile patients, and for those who are most severely affected. However, some GP report feeling pressured by patients to prescribe antibiotics especially if symptoms are particularly severe or the patient has responded to antibiotics in a previous episode.

---

*The biggest challenge is patients wanting antibiotics because they think that will cure everything! (GP 05)*

---

Most GPs reported limited use of saline irrigation in primary care. Despite recommendations from ENT, GPs were unfamiliar with the evidence and therefore unlikely to recommend them to patients, or patients were concerned about the cost of proprietary preparations.

---

*ENT doctors recommend it [saline irrigation] to patients, but that's not something I'd recommend myself....I just wasn't aware if it was evidence-based, or if it was something we should be recommending (GP 09).*

---

## Further medical treatment options

Some ENT specialists report the use of long term antibiotics for patients with CRS, although there is uncertainty about which patients might benefit and the optimum length of treatment.

---

*I think the issue is about what is the role of long-term antibiotics in rhinosinusitis and particularly the clarithromycin group of antibiotics? It is something I am aware of being used increasingly and I do now use in some patients (ENT 02).*

---

There is a mixed opinion about whether long-term antibiotics are appropriate for CRS patients with nasal polyps, with some ENT specialists describing them as ineffective, and a lack of evidence for their routine use. Others, however, recount prescribing low dose antibiotics alongside oral steroids for nasal polyps prior to consideration for surgery.

---

*I don't use clarithromycin for polyps. I know some people do but I don't because from my reading of the literature and all that I don't really see any of the benefit; (ENT07).*

---

Most GPs reported being unfamiliar with long term antibiotic use for CRS in primary care, and some were concerned about the potential for side effects.

---

*I don't have any experience of it. I'm not keen on long term courses of antibiotics, for this particular condition. (GP 07)*

---

GPs described infrequent use of oral steroids in primary care. ENT specialists report the use of oral steroids in the pre-operative pathway for patients with polyp disease. A rescue course of oral steroids is sometimes used for severe patients when symptoms are uncontrolled. Oral steroids were reported as rarely recommended for patients without nasal polyps.

---

*I think most people would say that the polyp group need a lot more oral steroid and a lot less antibiotic, and the non-polyp group need a lot less steroid and a lot more antibiotic, in general terms. (ENT08)*

---

## **Theme 3: Decision-making for surgery**

### **Implementing guidelines**

ENT specialists keep up to date with current practices in CRS by reading rhinology journals and attending ENT conferences. All ENT specialists were familiar with the EPOS guidelines and described them as a good source of evidence for diagnosis and treatment decisions, although most general ENT surgeons did not refer to them on a daily basis.

---

*So generally EPOS guidelines are probably the thing that I pay the most attention to. (ENT09)*

---

### **Value of sinus surgery**

ENT specialists describe sinus surgery as an important treatment for patients with severe disease, and when medical treatment options have been explored.

---

*Well, I think the patients at the more severe end of the spectrum, I think it offers them the best chance of a long-term improvement in symptoms. (ENT 05)*

---

Similarly, GPs viewed sinus surgery as a treatment option which should be reserved for more severe patients who have tried all available medical treatments.

---

*I think there is a role for surgery but I'm not someone who likes intervention. So, I would, initially, try all the things, the nasal therapies, basically, to see if that does the job first. Surgery is a last resort, for me. (GP 07)*

---

However, some specialists describe uncertainties about the value of a surgical intervention for an inflammatory condition.

---

*I'm not intellectually massively impressed by it, if I'm absolutely honest with you, the idea of doing an operation to help a mucosal inflammatory problem (ENT 08)*

---

ENT specialists identify the role of surgery in polyp disease and report prioritising these patients for surgical intervention.

---

*The severe polyp patients, the ones who are completely bunged up, I wouldn't bother with any of the medical therapy. I just put them on my operating list for surgery (ENT 05)*

---

Both GPs and specialists view surgery as a temporary rather than permanent solution for CRS. ENT specialists recount that most patients require ongoing medical treatment to manage symptoms after surgery, and GPs describe surgery as rarely a long-term solution for patients with CRS.

---

*I mean I think it's rare that surgery is curative for those people, I would say, they don't just go and have one operation and never have any problems with their nose and sinuses for the rest of their life! These patients come back and back, even when they've had surgery. (GP 02)*

---

### **Joint decision-making**

ENT specialists reported that decision-making for surgery is made jointly with the patient after all treatment options, risks and potential benefits have been discussed.

---

*It's very much up to the patients. Our patients are a very switched on bunch of people. They totally like to be involved in their decision, (ENT 09)*

---

However, both GPs and ENT specialists recognise that some patients have a high expectation for surgery whilst others express a reluctance for surgery, especially repeat surgery.

---

*Then there are some people who definitely want surgery from the outset, and don't want to have medical therapy, and they're difficult to manage because*

---

1  
2  
3 *they won't accept a trial of medical therapy, because they've had antibiotics*  
4 *before and they've had those sprays and those drops, and they don't work,*  
5 *(ENT 01)*  
6  
7

---

8  
9 Some GPs describe advising patients against surgery due to the possible complications, side  
10 effects and potentially limited benefits.  
11

12  
13  
14 *I tend to counsel people fairly strongly against having sinus surgery because I*  
15 *just don't believe it's a long-term benefit in the vast majority of cases (GP 04)*  
16

---

17  
18 Both GPs and ENT specialists recognise the potential risks of sinus surgery and describe the  
19 importance of balancing these against uncertain symptomatic relief for patients.  
20

21  
22  
23 *ENT surgery is painful, causes people to have a lot of time off work and may*  
24 *not yield high benefit and may make the problem worse. So I would have*  
25 *thought that that should come at a later stage, so not to cause harm (GP 01).*  
26

---

## 27 28 29 **Theme 4: Transition of care**

### 30 31 32 **Factors affecting referral**

33  
34  
35  
36 GPs use their clinical judgement when deciding either to continue to manage a patient in primary  
37 care or to refer for specialist opinion and further treatment options. The impact of symptoms on  
38 a patient's quality of life and response to medical treatments were recognised by GPs as  
39 important factors for referral.  
40

41  
42  
43  
44 *It really hinges, I think, on whether they're getting better with the simple*  
45 *treatment that we've put in place. If they're not getting better and it's*  
46 *affecting them and having effect on their functioning and their quality of life,*  
47 *then I would refer them. (GP 11)*  
48

---

49  
50 GPs explained that patients with visible nasal polyps and those with structural abnormalities  
51 were prioritised for referral due to the potential need for surgical intervention.  
52  
53  
54  
55

---

*I would refer someone if they had obstructing polyps that hadn't responded to medical polypectomy, assuming that they wanted to have a surgical polypectomy, (GP 04)*

---

Some GPs report patient pressure for early referral, although many GPs report giving patients the choice about continued treatment in primary care or referral for a specialist opinion.

---

*In some instances where they're adamant that they want to see a specialist, then we've had to write directly to the clinic and bypassing the referral to say that specifically this patient is wanting to see a specialist. (GP 08)*

---

Many GPs were unaware of local referral guidelines for CRS and based their decision for referral on personal experience. However, others described a referral triage system or a local referral support service who screen the referral against local guidelines.

---

*So, for the referral form, the guidelines are actually attached to that. So, at the point of referral, you can actually have a look at that and see if this patient fits or if there is more for you to do before it gets to ENT. (GP 07)*

---

### **Quality of referral**

ENT specialists report wide variation in the timing and quality of GP referrals to secondary care. Some specialists observed a delay in referral when symptoms are severe and suggest that earlier referral would be easier to treat and result in better outcomes for patients.

---

*So I quite frequently see patients that have suffered symptoms for many months, if not years. It's a very frequent comment that I get from patients, saying I've been trying to get referred to a specialist for ages and ages and they just won't refer me and they just give me nose drops and sprays. (ENT 05)*

---

Equally, other specialists report cases of premature referral, when patients have not received maximal available medical treatment in primary care.



---

*I think I might criticise them for referring too presumptuously because I think we do get referrals from GPs who haven't actually even initiated medical therapy. (ENT 02)*

---

## Discussion

### Synopses of key findings

This study explored GPs and ENT specialist views of current practice for managing patients with CRS. GPs describe themselves as confident in recognising CRS with the exception of nasal polyps, however, surgeons report common missed diagnoses when patients are referred to ENT clinics and attribute this to the limited ENT training of GPs and lack of available diagnostic tests or equipment. Local prescribing restrictions can affect choice of INCS in primary care and poor adherence is perceived to be the causes of inadequate symptom control. Symptom severity, poor response to medical treatment and patient pressure drives referral, although there is lack of clarity about optimal timing. ENT clinic letters are a valuable information source for GPs and ENT training courses are useful but infrequent. Treatment decisions in secondary care are based on disease severity, polyp status, prior medical treatment and patient choice. Long-term antibiotic use is variable and specialists are uncertain about optimal dosing and which patients might benefit. Surgery is regarded as an important treatment option for patients with severe symptoms and especially in those with nasal polyps, although timing of surgery remains unclear, and the uncertainty about net longer term benefits of surgery makes balancing of benefits and risks more difficult.

### Comparison with current literature

#### GP Management:

The findings of this study suggests that there is wide variation in the diagnosis and management of CRS in primary care in the UK, which is likely to be due to limited ENT training and insufficient national guidance. It has been long recognised that GPs receive limited ENT training at both undergraduate and postgraduate level<sup>16</sup> and this is particularly important in light of the number of ENT conditions that are initially seen in general practice. Our findings agree with previous

1  
2  
3 research that GPs would like further ENT training<sup>17</sup>, and that regional courses and updates might  
4 be useful to improve knowledge, clinical skills and referral pathways to secondary care.  
5  
6

7 Intranasal corticosteroids (INCS) are commonly prescribed for CRS, however our research  
8 identified local prescribing restrictions and that both adherence and adequacy of correct nasal  
9 spray use by patients was perceived to be extremely variable. These findings support the results  
10 of a case-control study in the UK which found that current INCS usage is less than 15% in CRS  
11 patients, and only 1% of patients regularly use saline nasal irrigation<sup>18</sup>. Such usage may result in  
12 poor symptom control and untimely referral. Reasons for low usage are likely to be multifactorial.  
13 Previous qualitative work has identified that patients can be dissatisfied with topical treatments  
14 due to their perceived ineffectiveness<sup>19</sup> and concern about potential side effects<sup>20</sup>. Similarly,  
15 nasal irrigation was not widely advocated by GPs in this study due to uncertainties about  
16 effectiveness and a perceived burden for patients. However, there is now evidence from a recent  
17 trial which found nasal irrigation to be acceptable to patients with recurrent or chronic  
18 rhinosinusitis and provides symptomatic benefit in the primary care setting<sup>21, 22</sup>. Currently in the  
19 UK, nasal irrigation kits cannot be prescribed by GPs as they are considered medical devices  
20 rather than medicines, so have to be purchased by patients and costs may deter uptake.  
21  
22  
23  
24  
25  
26

27 Some GPs described uncertainty about the optimal timing of referral, with wide variation in  
28 practice and a lack of clarity about referral criteria for both CRSsNP and CRSwNP.  
29 Correspondingly, ENT specialists reported variation in timing and precision of referral, expressing  
30 concerns that some patients experience unnecessarily delays, whilst others were referred too  
31 early and without trials of basic medical treatment. The EPOS guidelines<sup>3</sup> recommend referral in  
32 patients where no improvement has been achieved after 4 weeks of treatment with INCS and  
33 nasal irrigation. However, knowledge and uptake of the European guideline is understandably  
34 variable in UK primary care. An audit of CCGs in England found that compliance with CRS  
35 commissioning was limited in 13% of CCGs<sup>23</sup>. It may be that such guidance is not perceived in the  
36 same way that NICE guidance is viewed, affecting management and referral decisions, and  
37 fostering the variation of practice reported in this study. Similarly, in Dutch general practice,  
38 management of patients with CRS has been reported inconsistent and not always in accordance  
39 with local guidelines<sup>24</sup>.  
40  
41  
42  
43  
44  
45  
46  
47  
48  
49

## 50 **ENT management**

51  
52 Our study highlighted wide variation in diagnostic criteria and management decisions for CRS  
53 even amongst ENT specialists. Practice variation in usage of long-term antibiotics and timing of  
54  
55

1  
2  
3 sinus surgery suggest that there is a lack of clarity around the evidence base for treatment of  
4 both CRSsNP and CRSwNP. There remains a paucity of evidence for sinus surgery, and more  
5 research is required to understand best timing, although emerging evidence shows that surgery  
6 undertaken closer to the time of diagnosis may improve longer-term outcomes both in terms of  
7 symptoms and late onset asthma<sup>25, 26</sup>. There is also a perception amongst GPs and ENT specialists  
8 in this study that surgery was not of any long-term benefit and that patients will simply keep  
9 returning; this is of course borne out by the high revision rate seen in two UK national studies<sup>27,</sup>  
10 <sup>28</sup>. A key part of this issue is the post-operative care and compliance with topical treatment. The  
11 forthcoming trial in the MACRO programme<sup>14</sup> will address the role of sinus surgery in an RCT  
12 context which has not been done to date, despite many case series showing favourable outcomes,  
13 including the UK Sinonasal audit<sup>29</sup>. There will also be a longer-term plan to follow up the patients  
14 beyond the trial so that the benefits of sinus surgery beyond the short-term can be addressed.  
15  
16  
17  
18  
19  
20  
21  
22

### **Implications for practice**

23  
24  
25  
26  
27 In view of the currently fragmented and diverse situation, there is a need to clarify care pathways  
28 for CRSwNP and CRSsNP across primary and secondary care. Development of an evidence-based  
29 integrated care pathway, informed by patient, generalist and specialist perspectives, may help to  
30 improve management of patients with CRS. Communication between ENT and general practice  
31 needs enhancing, and clarification of diagnostic, treatment, and referral algorithms has the  
32 potential to improvement early management and precision of referral. Improving the  
33 information to both patients and clinicians as to the appropriate use of both medical and surgical  
34 interventions to best effect, including addressing rationale for treatment options, safety,  
35 technique, compliance and dispelling misperceptions around the various treatment options, has  
36 the potential to improve outcomes and reduce variation and costs.  
37  
38  
39  
40  
41  
42  
43

### **Strengths and limitations**

44  
45  
46  
47 A key strength of this study was the inclusion of both generalist and specialist views from  
48 representative samples of front-line clinicians, to provide a better understanding of the CRS  
49 patient pathway from multiple perspectives which have not been captured in previous studies.  
50 However, it is possible that our sample of clinicians were particularly interested in CRS or research  
51 of this nature and thus their views may not have represented those of the non-respondents.  
52  
53  
54  
55  
56  
57  
58  
59  
60

1  
2  
3 A good level of thematic data saturation was achieved with our sample of participants, but we  
4 acknowledge that the views of other stakeholders such as nurse practitioners in primary care and  
5 ENT speciality doctors may have provided an additional viewpoint.  
6  
7

8 Additionally the views and experiences of patients with CRS are important in understanding the  
9 patient journey and these are presented elsewhere.  
10  
11

12 This study used rigorous methods to ensure credibility and trustworthiness of the findings,  
13 including multiple coders, constant comparison techniques, and maintained a transparent audit  
14 trail.  
15  
16

## 17 **Conclusion**

18  
19  
20  
21 In summary this qualitative study found that clinicians are uncertain about best management of  
22 patients with CRS in both primary and secondary care, and there is wide variation in practice.  
23 Improved communication between ENT and general practice together with an evidence-based  
24 integrated care pathway for CRSsNP and CRSwNP is needed to improve CRS patient management  
25 and timely referral.  
26  
27  
28

## 29 **Author statement**

30  
31  
32  
33 The protocol was developed by CE, MT, CP, CH, AS, PL and HB. JV led the data collection and  
34 analysis, with academic contributions from CE, MT, CP and CH. JV drafted the manuscript and  
35 coordinated the revisions from all authors. All authors read and approved the final  
36 manuscripts.  
37  
38

39 A patient contributor (JB) from the MACRO programme management group also provided input  
40 into the design of the study, and reviewed and commented on drafts of this manuscript.  
41  
42  
43  
44  
45  
46  
47  
48  
49  
50  
51  
52  
53  
54  
55  
56  
57  
58  
59  
60

## Funding

This paper presents independent research funded by the National Institute for Health Research (NIHR) under its Programme Grants for Applied Research (PGfAR) Programme (Grant Reference Number RP-PG-0614-20011). The views expressed are those of the author(s) and not necessarily those of the NHS, the NIHR or the Department of Health

## Competing interests

None declared

## Acknowledgements

The authors would like to thank the healthcare professionals who contributed and made this study possible.

## Data sharing statement

There is no additional data available for sharing.

## References

1. Gliklich RE and Metson R. The health impact of chronic sinusitis in patients seeking otolaryngologic care. *Otolaryngology--head and neck surgery : official journal of American Academy of Otolaryngology-Head and Neck Surgery* 1995; 113: 104-109. 1995/07/01. DOI: 10.1016/s0194-59989570152-4.
2. Wensing M, Vingerhoets E and Grol R. Functional status, health problems, age and comorbidity in primary care patients. *Quality of life research : an international journal of quality of life aspects of treatment, care and rehabilitation* 2001; 10: 141-148. 2001/10/20.
3. Fokkens WJ, Lund VJ, Mullol J, et al. EPOS 2012: European position paper on rhinosinusitis and nasal polyps 2012. A summary for otorhinolaryngologists. *Rhinology* 2012; 50: 1-12. 2012/04/04. DOI: 10.4193/Rhino50E2.

- 1  
2  
3 4. Hastan D, Fokkens WJ, Bachert C, et al. Chronic rhinosinusitis in Europe--an  
4 underestimated disease. A GA(2)LEN study. *Allergy* 2011; 66: 1216-1223. DOI: 10.1111/j.1398-  
5 9995.2011.02646.x.  
6  
7
- 8 5. Hopkins C, Holy C and Philpott C. Care pathway of patients with chronic rhinosinusitis in  
9 the UK. 2015. In British Academic Conference in Otorhinolaryngology, Liverpool.  
10
- 11 6. Hospital Episode statistics, Department of Health. 2013.  
12
- 13 7. Desrosiers M, Evans GA, Keith PK, et al. Canadian clinical practice guidelines for acute  
14 and chronic rhinosinusitis. *Allergy, asthma, and clinical immunology : official journal of the*  
15 *Canadian Society of Allergy and Clinical Immunology* 2011; 7: 2. 2011/02/12. DOI:  
16 10.1186/1710-1492-7-2.  
17  
18
- 19 8. Royal College of Surgeons 2013. Commissioning Guide: available at:  
20 [https://www.rcseng.ac.uk/standards-and-research/commissioning/commissioning-](https://www.rcseng.ac.uk/standards-and-research/commissioning/commissioning-guides/topics/)  
21 [guides/topics/](https://www.rcseng.ac.uk/standards-and-research/commissioning/commissioning-guides/topics/).  
22  
23
- 24 9. Chong LY, Head K, Hopkins C, et al. Different types of intranasal steroids for chronic  
25 rhinosinusitis. *Cochrane Database Syst Rev* 2016; 4: Cd011993. 2016/04/27. DOI:  
26 10.1002/14651858.CD011993.pub2.  
27  
28
- 29 10. Chong LY, Head K, Hopkins C, et al. Intranasal steroids versus placebo or no intervention  
30 for chronic rhinosinusitis. *Cochrane Database Syst Rev* 2016; 4: Cd011996. 2016/04/27. DOI:  
31 10.1002/14651858.CD011996.pub2.  
32
- 33 11. Chong LY, Head K, Hopkins C, et al. Saline irrigation for chronic rhinosinusitis. *Cochrane*  
34 *Database Syst Rev* 2016; 4: Cd011995. 2016/04/27. DOI: 10.1002/14651858.CD011995.pub2.  
35  
36
- 37 12. Gulliford MC, Dregan A, Moore MV, et al. Continued high rates of antibiotic prescribing  
38 to adults with respiratory tract infection: survey of 568 UK general practices. *BMJ Open* 2014; 4:  
39 e006245. 2014/10/29. DOI: 10.1136/bmjopen-2014-006245.  
40
- 41 13. Lasso A, Masoudian P, Quinn JG, et al. Long-term low-dose macrolides for chronic  
42 rhinosinusitis in adults - a systematic review of the literature. *Clinical otolaryngology : official*  
43 *journal of ENT-UK ; official journal of Netherlands Society for Oto-Rhino-Laryngology & Cervico-*  
44 *Facial Surgery* 2017; 42: 637-650. 2016/11/04. DOI: 10.1111/coa.12787.  
45  
46
- 47 14. The MACRO programme, <https://www.themacroprogramme.org.uk/> (accessed January  
48 2018).  
49
- 50 15. Braun V and Clarke V. Using thematic analysis in psychology. *Qualitative Research in*  
51 *Psychology*, 3, 77-101. 2006.  
52  
53  
54  
55  
56  
57  
58  
59  
60

- 1  
2  
3 16. Clamp PJ, Gunasekaran S, Pothier DD, et al. ENT in general practice: training, experience  
4 and referral rates. *The Journal of Laryngology & Otolaryngology* 2006; 121: 580-583. 10/19.  
5 DOI: 10.1017/S0022215106003495.  
6  
7  
8 17. Easto RH and Reddy V. A survey of ENT experience in South West Peninsula general  
9 practitioner trainees: how can post-graduate ENT training be improved? *The Journal of*  
10 *Laryngology & Otolaryngology* 2016; 130: 893-896. 09/08. DOI: 10.1017/S0022215116008665.  
11  
12 18. Philpott C, Erskine S, Smith R, et al. Current Use of Baseline Medical Treatment in  
13 Chronic Rhinosinusitis: Data from the National Chronic Rhinosinusitis Epidemiology Study  
14 (CRES). *Clinical otolaryngology : official journal of ENT-UK ; official journal of Netherlands*  
15 *Society for Oto-Rhino-Laryngology & Cervico-Facial Surgery* 2017 2017/10/22. DOI:  
16 10.1111/coa.13012.  
17  
18  
19 19. Erskine SE, Verkerk MM, Notley C, et al. Chronic rhinosinusitis: patient experiences of  
20 primary and secondary care - a qualitative study. *Clinical otolaryngology : official journal of*  
21 *ENT-UK ; official journal of Netherlands Society for Oto-Rhino-Laryngology & Cervico-Facial*  
22 *Surgery* 2016; 41: 8-14. 2015/05/15. DOI: 10.1111/coa.12462.  
23  
24  
25 20. Hellings PW, Dobbels F, Denhaerynck K, et al. Explorative study on patient's perceived  
26 knowledge level, expectations, preferences and fear of side effects for treatment for allergic  
27 rhinitis. *Clinical and translational allergy* 2012; 2: 9. 2012/05/31. DOI: 10.1186/2045-7022-2-9.  
28  
29  
30 21. Little P, Stuart B, Mullee M, et al. Effectiveness of steam inhalation and nasal irrigation  
31 for chronic or recurrent sinus symptoms in primary care: a pragmatic randomized controlled  
32 trial. *CMAJ : Canadian Medical Association journal = journal de l'Association medicale*  
33 *canadienne* 2016; 188: 940-949. 2016/07/20. DOI: 10.1503/cmaj.160362.  
34  
35  
36 22. Little P, Leydon G, Thomas T, et al. 'Well, it literally stops me from having a life when it's  
37 really bad': a nested qualitative interview study of patient views on the use of self-management  
38 treatments for the management of recurrent sinusitis (SNIFS trial). *BMJ Open* 2017.  
39  
40  
41 23. Soni-Jaiswal A, Philpott C and Hopkins C. The impact of commissioning for rhinosinusitis  
42 in England. *Clin Otolaryngol* 2015; 40: 639-645. DOI: 10.1111/coa.12430.  
43  
44 24. Hoffmans R, Schermer T, van Weel C, et al. Management of rhinosinusitis in Dutch  
45 general practice. *Primary Care Respiratory Journal* 2011; 20: 64. Original Research. DOI:  
46 10.4104/pcrj.2010.00064.  
47  
48  
49 25. Hopkins C, Rimmer J and Lund VJ. Does time to endoscopic sinus surgery impact  
50 outcomes in Chronic Rhinosinusitis? Prospective findings from the National Comparative Audit  
51 of Surgery for Nasal Polyposis and Chronic Rhinosinusitis. *Rhinology* 2015; 53: 10-17. DOI:  
52 10.4193/Rhin13-217.  
53  
54  
55  
56  
57  
58  
59  
60

- 1  
2  
3 26. Benninger MS, Sindwani R, Holy CE, et al. Impact of medically recalcitrant chronic  
4 rhinosinusitis on incidence of asthma. *International forum of allergy & rhinology* 2016; 6: 124-  
5 129. 2015/12/02. DOI: 10.1002/alr.21652.  
6  
7  
8 27. Hopkins C, Slack R, Lund V, et al. Long-term outcomes from the English national  
9 comparative audit of surgery for nasal polyposis and chronic rhinosinusitis. *Laryngoscope* 2009;  
10 119: 2459-2465. DOI: 10.1002/lary.20653.  
11  
12 28. Philpott C, Hopkins C, Erskine S, et al. The burden of revision sinonasal surgery in the  
13 UK-data from the Chronic Rhinosinusitis Epidemiology Study (CRES): a cross-sectional study.  
14 *BMJ Open* 2015; 5: e006680. DOI: 10.1136/bmjopen-2014-006680.  
15  
16  
17 29. Hopkins C, Browne JP, Slack R, et al. The national comparative audit of surgery for nasal  
18 polyposis and chronic rhinosinusitis. *Clinical Otolaryngology* 2006; 31: 390-398. DOI:  
19 10.1111/j.1749-4486.2006.01275.x.  
20  
21  
22  
23  
24  
25  
26  
27  
28  
29  
30  
31  
32  
33  
34  
35  
36  
37  
38  
39  
40  
41  
42  
43  
44  
45  
46  
47  
48  
49  
50  
51  
52  
53  
54  
55  
56  
57  
58  
59  
60



## Appendix 1

### GP/ENT SPECIALIST INTERVIEW GUIDE

#### Section 1: Experiences with and diagnosing patients with chronic Rhinosinusitis (CRS)

- To start us off, I just want to ask you some specific questions about your experience of seeing patients who have chronic rhinosinusitis.
  - *Prompt:* understanding of the term chronic rhinosinusitis (CRS).
  - *Prompt:* how many patients.
  - *Prompt:* for any challenges
- Please talk me through the approach that you use to help decide whether a patient has CRS?
  - *Prompt:* for any challenges
  - *Prompt:* for views on any diagnostic criteria if aware of them.
  - *Prompt:* for familiarity with the different sub-categories of CRS (CRS with polyps, CRS without polyps).
  - *Prompt:* for any investigations or diagnostic tests.

#### Section 2: Experiences and views on treatment options for patients with CRS

##### GP views:

- Please talk me through your experience of treating patients with CRS
  - *Prompt:* for any challenges
  - *Prompt:* for any treatments you may initiate for patients with CRS
- What is your view of these treatments for managing CRS
  - *Prompt:* for antibiotics (standard short term antibiotics – such as 1-2 week courses, versus long term courses) nasal steroid sprays/drops/oral steroids and nasal douching/saline irrigations.
  - *Prompt:* for patient pressure for antibiotics
  - *Prompt:* for how they assess response to treatment
- How would you decide whether to, and when to refer/not refer your patient to a specialist?
- What is your view of the role of surgery in CRS?
- What is your preferred method of keeping up to date with the current evidence base for CRS

- *Prompt:* for how they keep up with evidence (journals, conferences, peer meetings).
- *Prompt:* for view of evidence base

### ENT specialist views:

- Please talk me through your experience of treating patients with CRS
  - *Prompt:* for any challenges
  - *Prompt:* for any treatments you may initiate for patients with CRS
- What is your view of these treatments for managing CRS
  - *Prompt:* for antibiotics (standard short term antibiotics – such as 1-2 week courses, versus long term courses) nasal steroid sprays/drops/oral steroids and nasal douching/saline irrigations.
  - *Prompt:* for how they assess response to treatment
- What is your view of the role of surgery for managing CRS
  - *Prompt:* for how they decide who to list for surgery
  - *Prompt:* for how they assess response to treatment
  - *Prompt:* How long they follow up CRS patients in clinic
- What is your preferred method of keeping up to date with the current evidence base for CRS
  - *Prompt:* for how they keep up with evidence (journals, conferences, peer meetings).
  - *Prompt:* for view of evidence base
- What is your view of the referrals that you get from GPs
  - *Prompt:* for the timing and quality of GP referrals received
  - *Prompt:* for too many or too few CRS referrals?

### Section 3: Views on use and knowledge of guidelines

- What are your views of aids to diagnosis and the treatment and management of CRS, such as diagnostic criteria and guidelines?
  - *Prompt:* for guidelines (local or national)
  - *Prompt:* for familiarity and usefulness of the commissioning guidelines from the Royal College of Surgeons of England/ENT UK?
  - *Prompt:* knowledge of any other local guidelines that their CCG may adhere to
  - *Prompt:* for any other local guidance, such as peer support
  - *Prompt:* for guidance sought from research evidence

## COREQ (COnsolidated criteria for REporting Qualitative research) Checklist

A checklist of items that should be included in reports of qualitative research. You must report the page number in your manuscript where you consider each of the items listed in this checklist. If you have not included this information, either revise your manuscript accordingly before submitting or note N/A.

| Topic                                          | Item No. | Guide Questions/Description                                                                                                                              | Reported on Page No. |
|------------------------------------------------|----------|----------------------------------------------------------------------------------------------------------------------------------------------------------|----------------------|
| <b>Domain 1: Research team and reflexivity</b> |          |                                                                                                                                                          |                      |
| <i>Personal characteristics</i>                |          |                                                                                                                                                          |                      |
| Interviewer/facilitator                        | 1        | Which author/s conducted the interview or focus group?                                                                                                   |                      |
| Credentials                                    | 2        | What were the researcher's credentials? E.g. PhD, MD                                                                                                     |                      |
| Occupation                                     | 3        | What was their occupation at the time of the study?                                                                                                      |                      |
| Gender                                         | 4        | Was the researcher male or female?                                                                                                                       |                      |
| Experience and training                        | 5        | What experience or training did the researcher have?                                                                                                     |                      |
| <i>Relationship with participants</i>          |          |                                                                                                                                                          |                      |
| Relationship established                       | 6        | Was a relationship established prior to study commencement?                                                                                              |                      |
| Participant knowledge of the interviewer       | 7        | What did the participants know about the researcher? e.g. personal goals, reasons for doing the research                                                 |                      |
| Interviewer characteristics                    | 8        | What characteristics were reported about the interviewer/facilitator? e.g. Bias, assumptions, reasons and interests in the research topic                |                      |
| <b>Domain 2: Study design</b>                  |          |                                                                                                                                                          |                      |
| <i>Theoretical framework</i>                   |          |                                                                                                                                                          |                      |
| Methodological orientation and Theory          | 9        | What methodological orientation was stated to underpin the study? e.g. grounded theory, discourse analysis, ethnography, phenomenology, content analysis |                      |
| <i>Participant selection</i>                   |          |                                                                                                                                                          |                      |
| Sampling                                       | 10       | How were participants selected? e.g. purposive, convenience, consecutive, snowball                                                                       |                      |
| Method of approach                             | 11       | How were participants approached? e.g. face-to-face, telephone, mail, email                                                                              |                      |
| Sample size                                    | 12       | How many participants were in the study?                                                                                                                 |                      |
| Non-participation                              | 13       | How many people refused to participate or dropped out? Reasons?                                                                                          |                      |
| <i>Setting</i>                                 |          |                                                                                                                                                          |                      |
| Setting of data collection                     | 14       | Where was the data collected? e.g. home, clinic, workplace                                                                                               |                      |
| Presence of non-participants                   | 15       | Was anyone else present besides the participants and researchers?                                                                                        |                      |
| Description of sample                          | 16       | What are the important characteristics of the sample? e.g. demographic data, date                                                                        |                      |
| <i>Data collection</i>                         |          |                                                                                                                                                          |                      |
| Interview guide                                | 17       | Were questions, prompts, guides provided by the authors? Was it pilot tested?                                                                            |                      |
| Repeat interviews                              | 18       | Were repeat interviews carried out? If yes, how many?                                                                                                    |                      |
| Audio/visual recording                         | 19       | Did the research use audio or visual recording to collect the data?                                                                                      |                      |
| Field notes                                    | 20       | Were field notes made during and/or after the interview or focus group?                                                                                  |                      |
| Duration                                       | 21       | What was the duration of the interviews or focus group?                                                                                                  |                      |
| Data saturation                                | 22       | Was data saturation discussed?                                                                                                                           |                      |
| Transcripts returned                           | 23       | Were transcripts returned to participants for comment and/or                                                                                             |                      |

| Topic                                  | Item No. | Guide Questions/Description                                                                                                        | Reported on Page No. |
|----------------------------------------|----------|------------------------------------------------------------------------------------------------------------------------------------|----------------------|
|                                        |          | correction?                                                                                                                        |                      |
| <b>Domain 3: analysis and findings</b> |          |                                                                                                                                    |                      |
| <i>Data analysis</i>                   |          |                                                                                                                                    |                      |
| Number of data coders                  | 24       | How many data coders coded the data?                                                                                               |                      |
| Description of the coding tree         | 25       | Did authors provide a description of the coding tree?                                                                              |                      |
| Derivation of themes                   | 26       | Were themes identified in advance or derived from the data?                                                                        |                      |
| Software                               | 27       | What software, if applicable, was used to manage the data?                                                                         |                      |
| Participant checking                   | 28       | Did participants provide feedback on the findings?                                                                                 |                      |
| <i>Reporting</i>                       |          |                                                                                                                                    |                      |
| Quotations presented                   | 29       | Were participant quotations presented to illustrate the themes/findings?<br>Was each quotation identified? e.g. participant number |                      |
| Data and findings consistent           | 30       | Was there consistency between the data presented and the findings?                                                                 |                      |
| Clarity of major themes                | 31       | Were major themes clearly presented in the findings?                                                                               |                      |
| Clarity of minor themes                | 32       | Is there a description of diverse cases or discussion of minor themes?                                                             |                      |

Developed from: Tong A, Sainsbury P, Craig J. Consolidated criteria for reporting qualitative research (COREQ): a 32-item checklist for interviews and focus groups. *International Journal for Quality in Health Care*. 2007. Volume 19, Number 6: pp. 349 – 357

**Once you have completed this checklist, please save a copy and upload it as part of your submission. DO NOT include this checklist as part of the main manuscript document. It must be uploaded as a separate file.**
